# Supplementary material for: Large-scale network integration in the human brain tracks temporal fluctuations in memory encoding performance
Source: eLife. 2018 Jun 18;7:e32696. doi: 10.7554/eLife.32696 (PMC6039182; doi:10.7554/eLife.32696)
Supplement: Figure 8—source data 1. — These data were used to generate the bar plots shown in Figures 8A, B and C. [file elife-32696-fig8-data1.xls]

## Sheet: Sheet1
	PC			Eloc			Eis
	Prediction accuracy	Threshold	P	Prediction accuracy	Threshold	P	Prediction accuracy	Threshold	P
High vs Low Encoding	74	66	0.0087	68	64	0.025	72	62	0.0037
More pic vs fewer pic	48	68	0.6303	52	60	0.4278	44	60	0.8867
longer RT vs shorter RT	50	70	0.5673	44	64	0.8055	38	62	0.9771
