# Supplementary material for: Large-scale network integration in the human brain tracks temporal fluctuations in memory encoding performance
Source: eLife. 2018 Jun 18;7:e32696. doi: 10.7554/eLife.32696 (PMC6039182; doi:10.7554/eLife.32696)
Supplement: Supplementary file 1. [file elife-32696-supp1.docx]

**Supplementary file 1**

**Supplementary file 1A. Details of 21 ROIs related with memory encoding.**

| **ROI ID** | **Name of ROI** | **Hemisphere** | **MNI coordinates** | | |
| --- | --- | --- | --- | --- | --- |
| ***x*** | ***y*** | ***z*** |
| Subsequent memory effect (SME) related areas | | | | | |
| 1 | Inferior frontal cortex, premotor cortex, precentral gyrus | L | -46 | 26 | 19 |
| 2 | Inferior frontal cortex, premotor cortex | R | 48 | 7 | 33 |
| 3 | Pre-supplementary motor cortex | L | -6 | 14 | 53 |
| 4 | Hippocampus, parahippocampal gyrus, amygdala | L | -22 | -9 | -20 |
| 5 | Hippocampus, parahippocampal gyrus, amygdala | R | 18 | -7 | -19 |
| 6 | Fusiform gyrus | L | -42 | -46 | -29 |
| 7 | Fusiform gyrus | R | 44 | -53 | -20 |
| 8 | Intraparietal sulcus | L | -28 | -80 | 35 |
| 9 | Intraparietal sulcus | R | 26 | -66 | 47 |
| 10 | Middle occipital gyrus | R | 28 | -89 | 2 |
| 11 | Inferior occipital gyrus | L | -32 | -92 | -12 |
| Subsequent forgotten effect (SFE) related areas | | | | | |
| 12 | Frontal pole | L | -26 | 54 | 27 |
| 13 | Frontal pole | R | 38 | 46 | 22 |
| 14 | Superior frontal cortex | L | -36 | 29 | 43 |
| 15 | Superior frontal cortex | R | 24 | 35 | 41 |
| 16 | Superior frontal cortex | R | 34 | 31 | 47 |
| 17 | Anterior cingulate cortex, ventromedial prefrontal cortex | - | 0 | 45 | 5 |
| 18 | Superior temporal gyrus | L | -48 | -14 | -10 |
| 19 | Posterior cingulate cortex, precuneus | - | 0 | -29 | 40 |
| 20 | Temporoparietal junction | L | -53 | -59 | 32 |
| 21 | Temporoparietal junction | R | 55 | -49 | 30 |

*Notes*. ROIs are derived from (Kim 2011).Table 2 and 6. Coordinates are converted from Talairach to MNI space.

**Supplementary file 1B. Differences in trial-related activation between HH and Miss trials in 21 ROIs related with memory encoding.**

| **SME** | | | | **SFE** | | | |
| --- | --- | --- | --- | --- | --- | --- | --- |
| **Name of ROI** | **H** | ***z*** | ***P*** | **Name of ROI** | **H** | ***z*** | ***P*** |
| Inferior frontal cortex (IFC),  Premotor cortex (PMC),  precentral gyrus | L | 4.1033 | 0.00004 | Frontal pole (FP) | L | -1.3857 | 0.16584 |
| Inferior frontal cortex,  Premotor cortex | R | 3.8611 | 0.00011 | FP | R | -3.2692 | 0.00108 |
| Pre-supplementary motor cortex | L | 3.4306 | 0.00060 | Superior frontal cortex | L | -2.0853 | 0.03704 |
| Hippocampus (HCP),  Parahippocampal gyrus (PHG),  amygdala | L | 3.9688 | 0.00007 | Superior frontal cortex | R | -3.4844 | 0.00049 |
| HCP, PHG, Amygdala | R | 4.3455 | 0.00001 | Superior frontal cortex | R | -3.4575 | 0.00055 |
| Fusiform gyrus | L | 3.9419 | 0.00008 | Anterior cingulate cortex (ACC),  ventromedial prefrontal cortex (vmPFC) | - | -4.3724 | 0.00001 |
| Fusiform gyrus | R | 4.3724 | 0.00001 | Superior temporal gyrus | L | -2.0584 | 0.03955 |
| Intraparietal sulcus (IPS) | L | 3.7535 | 0.00017 | Posterior cingulate cortex (PCC) ,  precuneus | - | -3.6997 | 0.00022 |
| IPS | R | 4.0495 | 0.00005 | Temporoparietal junction (TPJ) | L | -3.1347 | 0.00172 |
| Middle occipital gyrus (MOG) | R | 4.2917 | 0.00002 | TPJ | R | -4.3186 | 0.00002 |
| Inferior occipital gyrus | L | 3.8611 | 0.00011 |  |  |  |  |

**Supplementary file 1C.** **224 ROIs included in 10 subnetworks of the Power atlas.**

| **ROI ID** | **Name of ROI**  **(Automated Anatomical Label)** | **Hemisphere** | **MNI coordinates** | | | **Assigned network** |
| --- | --- | --- | --- | --- | --- | --- |
| ***x*** | ***y*** | ***z*** |
| 1 | Precuneus_L | L | -7 | -52 | 61 | SMN |
| 2 | undefined | L | -14 | -18 | 40 | SMN |
| 3 | Supp_Motor_Area_L | R | 0 | -15 | 47 | SMN |
| 4 | Supp_Motor_Area_R | R | 10 | -2 | 45 | SMN |
| 5 | Paracentral_Lobule_L | L | -7 | -21 | 65 | SMN |
| 6 | Paracentral_Lobule_L | L | -7 | -33 | 72 | SMN |
| 7 | Postcentral_R | R | 13 | -33 | 75 | SMN |
| 8 | Parietal_Inf_L | L | -54 | -23 | 43 | SMN |
| 9 | Precentral_R | R | 29 | -17 | 71 | SMN |
| 10 | Precuneus_R | R | 10 | -46 | 73 | SMN |
| 11 | Postcentral_L | L | -23 | -30 | 72 | SMN |
| 12 | Precentral_L | L | -40 | -19 | 54 | SMN |
| 13 | Postcentral_R | R | 29 | -39 | 59 | SMN |
| 14 | Postcentral_R | R | 50 | -20 | 42 | SMN |
| 15 | Postcentral_L | L | -38 | -27 | 69 | SMN |
| 16 | undefined | R | 20 | -29 | 60 | SMN |
| 17 | Precentral_R | R | 44 | -8 | 57 | SMN |
| 18 | Postcentral_L | L | -29 | -43 | 61 | SMN |
| 19 | Supp_Motor_Area_R | R | 10 | -17 | 74 | SMN |
| 20 | Postcentral_R | R | 22 | -42 | 69 | SMN |
| 21 | Postcentral_L | L | -45 | -32 | 47 | SMN |
| 22 | Postcentral_L | L | -21 | -31 | 61 | SMN |
| 23 | Paracentral_Lobule_L | L | -13 | -17 | 75 | SMN |
| 24 | Precentral_R | R | 42 | -20 | 55 | SMN |
| 25 | undefined | L | -38 | -15 | 69 | SMN |
| 26 | Parietal_Sup_L | L | -16 | -46 | 73 | SMN |
| 27 | Paracentral_Lobule_R | R | 2 | -28 | 60 | SMN |
| 28 | Supp_Motor_Area_R | R | 3 | -17 | 58 | SMN |
| 29 | Precentral_R | R | 38 | -17 | 45 | SMN |
| 30 | Postcentral_R | R | 47 | -30 | 49 | SMN |
| 31 | Postcentral_L | L | -49 | -11 | 35 | SMN |
| 32 | Insula_R | R | 36 | -9 | 14 | SMN |
| 33 | Postcentral_R | R | 51 | -6 | 32 | SMN |
| 34 | Postcentral_L | L | -53 | -10 | 24 | SMN |
| 35 | Postcentral_R | R | 66 | -8 | 25 | SMN |
| 36 | Supp_Motor_Area_L | L | -3 | 2 | 53 | CON |
| 37 | SupraMarginal_R | R | 54 | -28 | 34 | CON |
| 38 | Frontal_Sup_R | R | 19 | -8 | 64 | CON |
| 39 | Frontal_Sup_L | L | -16 | -5 | 71 | CON |
| 40 | Cingulum_Mid_L | L | -10 | -2 | 42 | CON |
| 41 | undefined | R | 37 | 1 | -4 | CON |
| 42 | Supp_Motor_Area_R | R | 13 | -1 | 70 | CON |
| 43 | Supp_Motor_Area_R | R | 7 | 8 | 51 | CON |
| 44 | Rolandic_Oper_L | L | -45 | 0 | 9 | CON |
| 45 | Insula_R | R | 49 | 8 | -1 | CON |
| 46 | undefined | L | -34 | 3 | 4 | CON |
| 47 | Temporal_Pole_Sup_L | L | -51 | 8 | -2 | CON |
| 48 | Cingulum_Mid_L | L | -5 | 18 | 34 | CON |
| 49 | undefined | R | 36 | 10 | 1 | CON |
| 50 | undefined | R | 32 | -26 | 13 | AUD |
| 51 | Temporal_Sup_R | R | 65 | -33 | 20 | AUD |
| 52 | Temporal_Sup_R | R | 58 | -16 | 7 | AUD |
| 53 | Rolandic_Oper_L | L | -38 | -33 | 17 | AUD |
| 54 | Temporal_Sup_L | L | -60 | -25 | 14 | AUD |
| 55 | Temporal_Sup_L | L | -49 | -26 | 5 | AUD |
| 56 | Rolandic_Oper_R | R | 43 | -23 | 20 | AUD |
| 57 | SupraMarginal_L | L | -50 | -34 | 26 | AUD |
| 58 | SupraMarginal_L | L | -53 | -22 | 23 | AUD |
| 59 | Rolandic_Oper_L | L | -55 | -9 | 12 | AUD |
| 60 | Rolandic_Oper_R | R | 56 | -5 | 13 | AUD |
| 61 | Postcentral_R | R | 59 | -17 | 29 | AUD |
| 62 | undefined | L | -30 | -27 | 12 | AUD |
| 63 | Occipital_Mid_L | L | -41 | -75 | 26 | DMN |
| 64 | Rectus_R | R | 8 | 48 | -15 | DMN |
| 65 | Precuneus_L | L | -13 | -40 | 1 | DMN |
| 66 | Temporal_Mid_L | L | -46 | -61 | 21 | DMN |
| 67 | Occipital_Mid_R | R | 43 | -72 | 28 | DMN |
| 68 | Temporal_Pole_Mid_L | L | -44 | 12 | -34 | DMN |
| 69 | Temporal_Pole_Mid_R | R | 46 | 16 | -30 | DMN |
| 70 | Temporal_Mid_L | L | -68 | -23 | -16 | DMN |
| 71 | Angular_L | L | -44 | -65 | 35 | DMN |
| 72 | Angular_L | L | -39 | -75 | 44 | DMN |
| 73 | Precuneus_L | L | -7 | -55 | 27 | DMN |
| 74 | Precuneus_R | R | 6 | -59 | 35 | DMN |
| 75 | Precuneus_L | L | -11 | -56 | 16 | DMN |
| 76 | Precuneus_L | L | -3 | -49 | 13 | DMN |
| 77 | Cingulum_Mid_R | R | 8 | -48 | 31 | DMN |
| 78 | Precuneus_R | R | 15 | -63 | 26 | DMN |
| 79 | Cingulum_Mid_L | L | -2 | -37 | 44 | DMN |
| 80 | Precuneus_R | R | 11 | -54 | 17 | DMN |
| 81 | Angular_R | R | 52 | -59 | 36 | DMN |
| 82 | Frontal_Sup_R | R | 23 | 33 | 48 | DMN |
| 83 | Frontal_Sup_Medial_L | L | -10 | 39 | 52 | DMN |
| 84 | Frontal_Sup_L | L | -16 | 29 | 53 | DMN |
| 85 | Frontal_Mid_L | L | -35 | 20 | 51 | DMN |
| 86 | Frontal_Sup_R | R | 22 | 39 | 39 | DMN |
| 87 | Frontal_Sup_R | R | 13 | 55 | 38 | DMN |
| 88 | Frontal_Sup_L | L | -10 | 55 | 39 | DMN |
| 89 | Frontal_Sup_L | L | -20 | 45 | 39 | DMN |
| 90 | Frontal_Sup_Medial_R | R | 6 | 54 | 16 | DMN |
| 91 | Frontal_Sup_Medial_R | R | 6 | 64 | 22 | DMN |
| 92 | Cingulum_Ant_L | L | -7 | 51 | -1 | DMN |
| 93 | Frontal_Sup_Medial_R | R | 9 | 54 | 3 | DMN |
| 94 | Frontal_Med_Orb_L | L | -3 | 44 | -9 | DMN |
| 95 | Frontal_Med_Orb_R | R | 8 | 42 | -5 | DMN |
| 96 | Cingulum_Ant_L | L | -11 | 45 | 8 | DMN |
| 97 | Frontal_Sup_Medial_L | L | -2 | 38 | 36 | DMN |
| 98 | Cingulum_Ant_L | L | -3 | 42 | 16 | DMN |
| 99 | Frontal_Sup_L | L | -20 | 64 | 19 | DMN |
| 100 | Frontal_Sup_Medial_L | L | -8 | 48 | 23 | DMN |
| 101 | Temporal_Mid_R | R | 65 | -12 | -19 | DMN |
| 102 | Temporal_Mid_L | L | -56 | -13 | -10 | DMN |
| 103 | Temporal_Mid_L | L | -58 | -30 | -4 | DMN |
| 104 | Temporal_Mid_R | R | 65 | -31 | -9 | DMN |
| 105 | Temporal_Mid_L | L | -68 | -41 | -5 | DMN |
| 106 | Frontal_Sup_Medial_R | R | 13 | 30 | 59 | DMN |
| 107 | Cingulum_Ant_R | R | 12 | 36 | 20 | DMN |
| 108 | Temporal_Mid_R | R | 52 | -2 | -16 | DMN |
| 109 | ParaHippocampal_L | L | -26 | -40 | -8 | DMN |
| 110 | Fusiform_R | R | 27 | -37 | -13 | DMN |
| 111 | Fusiform_L | L | -34 | -38 | -16 | DMN |
| 112 | Cerebelum_Crus1_R | R | 28 | -77 | -32 | DMN |
| 113 | Temporal_Pole_Mid_R | R | 52 | 7 | -30 | DMN |
| 114 | Temporal_Mid_L | L | -53 | 3 | -27 | DMN |
| 115 | Angular_R | R | 47 | -50 | 29 | DMN |
| 116 | Temporal_Mid_L | L | -49 | -42 | 1 | DMN |
| 117 | Frontal_Inf_Orb_L | L | -46 | 31 | -13 | DMN |
| 118 | Frontal_Inf_Orb_R | R | 49 | 35 | -12 | DMN |
| 119 | Lingual_R | R | 18 | -47 | -10 | VIN |
| 120 | Occipital_Mid_R | R | 40 | -72 | 14 | VIN |
| 121 | Calcarine_R | R | 8 | -72 | 11 | VIN |
| 122 | Calcarine_L | L | -8 | -81 | 7 | VIN |
| 123 | Occipital_Mid_L | L | -28 | -79 | 19 | VIN |
| 124 | Lingual_R | R | 20 | -66 | 2 | VIN |
| 125 | Occipital_Mid_L | L | -24 | -91 | 19 | VIN |
| 126 | Fusiform_R | R | 27 | -59 | -9 | VIN |
| 127 | Lingual_L | L | -15 | -72 | -8 | VIN |
| 128 | Calcarine_L | L | -18 | -68 | 5 | VIN |
| 129 | Occipital_Inf_R | R | 43 | -78 | -12 | VIN |
| 130 | Occipital_Inf_L | L | -47 | -76 | -10 | VIN |
| 131 | Occipital_Sup_L | L | -14 | -91 | 31 | VIN |
| 132 | Cuneus_R | R | 15 | -87 | 37 | VIN |
| 133 | Occipital_Mid_R | R | 29 | -77 | 25 | VIN |
| 134 | Lingual_R | R | 20 | -86 | -2 | VIN |
| 135 | Cuneus_R | R | 15 | -77 | 31 | VIN |
| 136 | Lingual_L | L | -16 | -52 | -1 | VIN |
| 137 | Temporal_Inf_R | R | 42 | -66 | -8 | VIN |
| 138 | Occipital_Sup_R | R | 24 | -87 | 24 | VIN |
| 139 | Cuneus_R | R | 6 | -72 | 24 | VIN |
| 140 | Occipital_Mid_L | L | -42 | -74 | 0 | VIN |
| 141 | Fusiform_R | R | 26 | -79 | -16 | VIN |
| 142 | Cuneus_L | L | -16 | -77 | 34 | VIN |
| 143 | Cuneus_L | L | -3 | -81 | 21 | VIN |
| 144 | Occipital_Mid_L | L | -40 | -88 | -6 | VIN |
| 145 | Occipital_Mid_R | R | 37 | -84 | 13 | VIN |
| 146 | Calcarine_R | R | 6 | -81 | 6 | VIN |
| 147 | Occipital_Mid_L | L | -26 | -90 | 3 | VIN |
| 148 | Fusiform_L | L | -33 | -79 | -13 | VIN |
| 149 | Occipital_Mid_R | R | 37 | -81 | 1 | VIN |
| 150 | Precentral_L | L | -44 | 2 | 46 | FPN |
| 151 | Frontal_Inf_Tri_R | R | 48 | 25 | 27 | FPN |
| 152 | Frontal_Inf_Tri_L | L | -47 | 11 | 23 | FPN |
| 153 | Parietal_Inf_L | L | -53 | -49 | 43 | FPN |
| 154 | Frontal_Mid_L | L | -23 | 11 | 64 | FPN |
| 155 | Temporal_Inf_R | R | 58 | -53 | -14 | FPN |
| 156 | Frontal_Sup_Orb_R | R | 24 | 45 | -15 | FPN |
| 157 | Frontal_Mid_Orb_R | R | 34 | 54 | -13 | FPN |
| 158 | Precentral_R | R | 47 | 10 | 33 | FPN |
| 159 | Precentral_L | L | -41 | 6 | 33 | FPN |
| 160 | Frontal_Mid_R | R | 38 | 43 | 15 | FPN |
| 161 | Parietal_Inf_R | R | 49 | -42 | 45 | FPN |
| 162 | Parietal_Inf_L | L | -28 | -58 | 48 | FPN |
| 163 | Parietal_Inf_R | R | 44 | -53 | 47 | FPN |
| 164 | Frontal_Mid_R | R | 32 | 14 | 56 | FPN |
| 165 | Angular_R | R | 37 | -65 | 40 | FPN |
| 166 | Parietal_Inf_L | L | -42 | -55 | 45 | FPN |
| 167 | Frontal_Mid_R | R | 40 | 18 | 40 | FPN |
| 168 | Frontal_Mid_L | L | -34 | 55 | 4 | FPN |
| 169 | Frontal_Mid_Orb_L | L | -42 | 45 | -2 | FPN |
| 170 | Angular_R | R | 33 | -53 | 44 | FPN |
| 171 | Frontal_Mid_Orb_R | R | 43 | 49 | -2 | FPN |
| 172 | Frontal_Inf_Tri_L | L | -42 | 25 | 30 | FPN |
| 173 | Frontal_Sup_Medial_L | L | -3 | 26 | 44 | FPN |
| 174 | Cingulum_Mid_R | R | 11 | -39 | 50 | SAN |
| 175 | Parietal_Inf_R | R | 55 | -45 | 37 | SAN |
| 176 | Precentral_R | R | 42 | 0 | 47 | SAN |
| 177 | Frontal_Mid_R | R | 31 | 33 | 26 | SAN |
| 178 | Frontal_Inf_Tri_R | R | 48 | 22 | 10 | SAN |
| 179 | Insula_L | L | -35 | 20 | 0 | SAN |
| 180 | Insula_R | R | 36 | 22 | 3 | SAN |
| 181 | Frontal_Inf_Orb_R | R | 37 | 32 | -2 | SAN |
| 182 | Insula_R | R | 34 | 16 | -8 | SAN |
| 183 | undefined | L | -11 | 26 | 25 | SAN |
| 184 | Supp_Motor_Area_L | L | -1 | 15 | 44 | SAN |
| 185 | Frontal_Mid_L | L | -28 | 52 | 21 | SAN |
| 186 | Cingulum_Ant_L | L | 0 | 30 | 27 | SAN |
| 187 | Cingulum_Mid_R | R | 5 | 23 | 37 | SAN |
| 188 | Cingulum_Ant_R | R | 10 | 22 | 27 | SAN |
| 189 | Frontal_Mid_R | R | 31 | 56 | 14 | SAN |
| 190 | Frontal_Mid_R | R | 26 | 50 | 27 | SAN |
| 191 | Frontal_Mid_L | L | -39 | 51 | 17 | SAN |
| 192 | Thalamus_R | R | 6 | -24 | 0 | SUB |
| 193 | Thalamus_L | L | -2 | -13 | 12 | SUB |
| 194 | Thalamus_L | L | -10 | -18 | 7 | SUB |
| 195 | Thalamus_R | R | 12 | -17 | 8 | SUB |
| 196 | undefined | L | -5 | -28 | -4 | SUB |
| 197 | Putamen_L | L | -22 | 7 | -5 | SUB |
| 198 | undefined | L | -15 | 4 | 8 | SUB |
| 199 | Putamen_R | R | 31 | -14 | 2 | SUB |
| 200 | Putamen_R | R | 23 | 10 | 1 | SUB |
| 201 | Putamen_R | R | 29 | 1 | 4 | SUB |
| 202 | undefined | L | -31 | -11 | 0 | SUB |
| 203 | undefined | R | 15 | 5 | 7 | SUB |
| 204 | undefined | R | 9 | -4 | 6 | SUB |
| 205 | Supp_Motor_Area_L | L | -10 | 11 | 67 | VAN |
| 206 | Temporal_Sup_R | R | 54 | -43 | 22 | VAN |
| 207 | Temporal_Mid_L | L | -56 | -50 | 10 | VAN |
| 208 | Temporal_Sup_L | L | -55 | -40 | 14 | VAN |
| 209 | Temporal_Sup_R | R | 52 | -33 | 8 | VAN |
| 210 | Temporal_Mid_R | R | 51 | -29 | -4 | VAN |
| 211 | Temporal_Sup_R | R | 56 | -46 | 11 | VAN |
| 212 | Frontal_Inf_Tri_R | R | 53 | 33 | 1 | VAN |
| 213 | Frontal_Inf_Tri_L | L | -49 | 25 | -1 | VAN |
| 214 | Precuneus_R | R | 10 | -62 | 61 | DAN |
| 215 | Temporal_Mid_L | L | -52 | -63 | 5 | DAN |
| 216 | Parietal_Sup_R | R | 22 | -65 | 48 | DAN |
| 217 | Temporal_Mid_R | R | 46 | -59 | 4 | DAN |
| 218 | Parietal_Sup_R | R | 25 | -58 | 60 | DAN |
| 219 | Parietal_Inf_L | L | -33 | -46 | 47 | DAN |
| 220 | Occipital_Mid_L | L | -27 | -71 | 37 | DAN |
| 221 | Precentral_L | L | -32 | -1 | 54 | DAN |
| 222 | Temporal_Inf_L | L | -42 | -60 | -9 | DAN |
| 223 | Parietal_Sup_L | L | -17 | -59 | 64 | DAN |
| 224 | Precentral_R | R | 29 | -5 | 54 | DAN |

*Note*. SMN, sensorimotor networks; CON, cingulo-opercular network; AUD, auditory network; DMN, default mode network; VIN, visual network; FPN, fronto-parietal network; SAN, salience network; SUB, subcortical nodes; VAN, ventral attention network; DAN, dorsal attention network.

**Supplementary file 1D. 98 connections showing significant increase in FC during the high encoding state.**

| **Subnetwork pairs** | | **ROI pairs** | | ***z*** | ***P*** |
| --- | --- | --- | --- | --- | --- |
| DMN | SMN | Frontal_Sup_Medial_R | Postcentral_L | 3.5114 | 0.0004 |
| DMN | Frontal_Sup_L | Angular_L | 3.4844 | 0.0005 |
| Frontal_Sup_R | Temporal_Pole_Mid_L | 3.2423 | 0.0012 |
| Frontal_Sup_Medial_R | Frontal_Sup_Medial_L | 3.2961 | 0.0010 |
| Temporal_Mid_L | Frontal_Sup_R | 3.2154 | 0.0013 |
| Cingulum_Ant_R | Frontal_Sup_Medial_L | 3.5921 | 0.0003 |
| Temporal_Mid_L | Frontal_Sup_Medial_R | 3.1885 | 0.0014 |
| VIN | SMN | Occipital_Inf_R | undefined | 3.2423 | 0.0012 |
| Occipital_Inf_R | Insula_R | 3.2961 | 0.0010 |
| Fusiform_R | Parietal_Inf_L | 3.3768 | 0.0007 |
| Fusiform_R | Postcentral_L | 3.9957 | 0.0001 |
| Fusiform_R | Precentral_R | 3.5114 | 0.0004 |
| Fusiform_R | Postcentral_R | 3.1616 | 0.0016 |
| Fusiform_R | Postcentral_L | 3.8073 | 0.0001 |
| Fusiform_R | Insula_R | 3.9150 | 0.0001 |
| Fusiform_R | Postcentral_L | 3.6459 | 0.0003 |
| Occipital_Mid_L | Postcentral_R | 4.0226 | 0.0001 |
| Occipital_Mid_L | Precentral_R | 3.2692 | 0.0011 |
| Occipital_Mid_L | Postcentral_R | 3.8880 | 0.0001 |
| Occipital_Mid_L | Precentral_R | 3.4844 | 0.0005 |
| Occipital_Mid_L | Postcentral_L | 3.5383 | 0.0004 |
| Occipital_Mid_L | Postcentral_L | 3.1616 | 0.0016 |
| Occipital_Mid_L | Paracentral_Lobule_L | 3.3499 | 0.0008 |
| Occipital_Mid_L | Precentral_R | 3.5114 | 0.0004 |
| Occipital_Mid_L | Precentral_R | 3.2154 | 0.0013 |
| Occipital_Mid_L | Parietal_Inf_L | 3.1885 | 0.0014 |
| Occipital_Mid_L | Postcentral_R | 3.2961 | 0.0010 |
| Occipital_Mid_L | Precentral_R | 3.4844 | 0.0005 |
| Occipital_Mid_L | Precentral_R | 3.3768 | 0.0007 |
| Fusiform_L | Postcentral_L | 3.8342 | 0.0001 |
| Fusiform_L | Precentral_R | 3.3230 | 0.0009 |
| VIN | Fusiform_R | Lingual_R | 3.6728 | 0.0002 |
| Fusiform_R | Fusiform_R | 3.5921 | 0.0003 |
| Fusiform_R | Occipital_Mid_R | 3.1616 | 0.0016 |
| Fusiform_R | Occipital_Sup_R | 3.1616 | 0.0016 |
| Fusiform_R | Cuneus_R | 3.4037 | 0.0007 |
| Cuneus_L | Fusiform_R | 3.6728 | 0.0002 |
| Occipital_Mid_R | Occipital_Mid_L | 3.6997 | 0.0002 |
| DMN | Occipital_Mid_L | Precuneus_L | 3.4575 | 0.0005 |
| Occipital_Mid_L | Fusiform_R | 3.2692 | 0.0011 |
| AUD | Fusiform_R | Temporal_Sup_R | 3.4306 | 0.0006 |
| Occipital_Mid_L | SupraMarginal_L | 3.2961 | 0.0010 |
| Occipital_Mid_L | Rolandic_Oper_L | 3.2423 | 0.0012 |
| CON | Lingual_R | Supp_Motor_Area_R | 3.2423 | 0.0012 |
| Occipital_Mid_L | Frontal_Sup_L | 3.4844 | 0.0005 |
| FPN | SMN | Parietal_Inf_L | Postcentral_R | 3.3230 | 0.0009 |
| Precentral_L | Postcentral_R | 3.1885 | 0.0014 |
| Frontal_Mid_L | Parietal_Sup_L | 3.6997 | 0.0002 |
| VIN | Frontal_Mid_R | Occipital_Sup_L | 3.4844 | 0.0005 |
| SAN | SMN | Frontal_Mid_L | Paracentral_Lobule_L | 3.5114 | 0.0004 |
| Frontal_Mid_L | Postcentral_R | 3.1885 | 0.0014 |
| Frontal_Mid_L | Precentral_L | 3.2961 | 0.0010 |
| Frontal_Mid_L | Postcentral_R | 3.1616 | 0.0016 |
| Frontal_Mid_L | Postcentral_R | 3.7804 | 0.0002 |
| Frontal_Mid_L | Paracentral_Lobule_R | 3.5114 | 0.0004 |
| Cingulum_Mid_R | Precentral_R | 3.5114 | 0.0004 |
| Frontal_Mid_L | Postcentral_R | 3.1616 | 0.0016 |
| Frontal_Mid_L | Postcentral_L | 3.3230 | 0.0009 |
| Frontal_Mid_L | undefined | 3.5383 | 0.0004 |
| Frontal_Mid_L | Postcentral_L | 3.3499 | 0.0008 |
| Frontal_Mid_L | Insula_R | 3.5114 | 0.0004 |
| FPN | Parietal_Inf_R | Frontal_Mid_Orb_L | 3.1616 | 0.0016 |
| VIN | Frontal_Mid_L | Cuneus_R | 3.2154 | 0.0013 |
| DMN | Parietal_Inf_R | Temporal_Pole_Mid_L | 3.1616 | 0.0016 |
| Parietal_Inf_R | Frontal_Sup_L | 3.3499 | 0.0008 |
| Parietal_Inf_R | Temporal_Pole_Mid_R | 3.5921 | 0.0003 |
| Parietal_Inf_R | Temporal_Mid_L | 3.2692 | 0.0011 |
| Frontal_Inf_Tri_R | Frontal_Sup_Medial_L | 3.5383 | 0.0004 |
| Frontal_Mid_L | Cingulum_Ant_L | 3.5921 | 0.0003 |
| Frontal_Mid_R | Temporal_Mid_L | 3.3499 | 0.0008 |
| Frontal_Mid_R | Cingulum_Mid_R | 3.1616 | 0.0016 |
| AUD | undefined | Temporal_Sup_R | 3.4306 | 0.0006 |
| Frontal_Mid_L | Rolandic_Oper_R | 3.3499 | 0.0008 |
| Cingulum_Ant_L | SupraMarginal_L | 3.3499 | 0.0008 |
| CON | Parietal_Inf_R | Cingulum_Mid_L | 3.5921 | 0.0003 |
| SUB | SMN | undefined | Paracentral_Lobule_R | 3.1616 | 0.0016 |
| undefined | Supp_Motor_Area_R | 3.2154 | 0.0013 |
| undefined | Paracentral_Lobule_L | 3.9688 | 0.0001 |
| SUB | Putamen_R | Thalamus_L | 3.1616 | 0.0016 |
| VIN | Thalamus_L | Cuneus_L | 3.2154 | 0.0013 |
| undefined | Fusiform_R | 3.2154 | 0.0013 |
| DMN | Thalamus_R | Frontal_Sup_Medial_L | 3.4037 | 0.0007 |
| Thalamus_R | Cerebelum_Crus1_R | 3.5383 | 0.0004 |
| Thalamus_L | Temporal_Pole_Mid_L | 3.2961 | 0.0010 |
| undefined | Frontal_Sup_R | 3.3768 | 0.0007 |
| undefined | Frontal_Sup_Medial_L | 3.2961 | 0.0010 |
| undefined | Temporal_Pole_Mid_R | 3.4575 | 0.0005 |
| undefined | Temporal_Mid_L | 3.3768 | 0.0007 |
| CON | undefined | Frontal_Sup_R | 3.1616 | 0.0016 |
| VAN | SUB | Temporal_Sup_L | undefined | 3.8880 | 0.0001 |
| Temporal_Sup_R | Thalamus_L | 3.1616 | 0.0016 |
| VIN | Temporal_Sup_L | Occipital_Mid_L | 3.2423 | 0.0012 |
| DMN | Temporal_Mid_L | Cerebelum_Crus1_R | 3.1616 | 0.0016 |
| Temporal_Mid_R | Cingulum_Ant_L | 3.3768 | 0.0007 |
| Frontal_Inf_Tri_L | Cingulum_Ant_L | 3.5921 | 0.0003 |
| DAN | SUB | Precuneus_R | undefined | 3.2961 | 0.0010 |
| FPN | Precentral_L | Angular_R | 3.1616 | 0.0016 |
| VIN | Precentral_R | Occipital_Mid_L | 3.1885 | 0.0014 |

**Supplementary file 1E. 687 connections showing significant decrease in FC during the high encoding state.**

| **Subnetwork pairs** | | **ROI pairs** | | ***z*** | ***P*** |
| --- | --- | --- | --- | --- | --- |
| SMN | SMN | Paracentral_Lobule_L | Paracentral_Lobule_L | -3.3230 | 0.0009 |
| Parietal_Inf_L | Supp_Motor_Area_L | -3.6459 | 0.0003 |
| Precentral_L | Precentral_R | -3.7266 | 0.0002 |
| Postcentral_L | Precentral_R | -3.6997 | 0.0002 |
| undefined | Parietal_Inf_L | -3.3768 | 0.0007 |
| undefined | Precentral_L | -3.3230 | 0.0009 |
| undefined | Postcentral_R | -3.1616 | 0.0016 |
| undefined | Postcentral_L | -3.4306 | 0.0006 |
| Precentral_R | Supp_Motor_Area_L | -3.2154 | 0.0013 |
| Postcentral_L | Precentral_R | -3.2692 | 0.0011 |
| Postcentral_L | undefined | -3.4575 | 0.0005 |
| Postcentral_R | Postcentral_L | -3.2423 | 0.0012 |
| Postcentral_L | Postcentral_R | -3.5114 | 0.0004 |
| Paracentral_Lobule_L | Postcentral_R | -3.7804 | 0.0002 |
| Precentral_R | Supp_Motor_Area_L | -3.1616 | 0.0016 |
| undefined | Precentral_R | -3.6997 | 0.0002 |
| Supp_Motor_Area_R | Precentral_L | -3.5652 | 0.0004 |
| Supp_Motor_Area_R | Postcentral_R | -3.2961 | 0.0010 |
| Supp_Motor_Area_R | Precentral_R | -3.5921 | 0.0003 |
| Supp_Motor_Area_R | Postcentral_L | -3.6459 | 0.0003 |
| Supp_Motor_Area_R | Postcentral_L | -3.2154 | 0.0013 |
| Precentral_R | Parietal_Inf_L | -3.1885 | 0.0014 |
| Precentral_R | Postcentral_L | -3.2154 | 0.0013 |
| Postcentral_L | Postcentral_L | -3.2692 | 0.0011 |
| Postcentral_L | Postcentral_L | -3.7266 | 0.0002 |
| Postcentral_L | Paracentral_Lobule_L | -3.4844 | 0.0005 |
| Postcentral_L | Supp_Motor_Area_R | -3.6728 | 0.0002 |
| Insula_R | Supp_Motor_Area_R | -3.2961 | 0.0010 |
| Insula_R | Postcentral_R | -3.2154 | 0.0013 |
| Insula_R | Precentral_R | -3.2961 | 0.0010 |
| Insula_R | Postcentral_L | -3.5652 | 0.0004 |
| Insula_R | Precentral_R | -3.1885 | 0.0014 |
| Postcentral_L | Supp_Motor_Area_R | -3.2692 | 0.0011 |
| Postcentral_R | Postcentral_R | -3.8342 | 0.0001 |
| Postcentral_R | Precentral_R | -3.4844 | 0.0005 |
| CON | SMN | SupraMarginal_R | Precentral_R | -3.2154 | 0.0013 |
| Frontal_Sup_R | Supp_Motor_Area_R | -3.1616 | 0.0016 |
| Frontal_Sup_L | Paracentral_Lobule_L | -3.7266 | 0.0002 |
| Cingulum_Mid_L | Insula_R | -3.8073 | 0.0001 |
| Supp_Motor_Area_R | Supp_Motor_Area_R | -3.2423 | 0.0012 |
| Rolandic_Oper_L | Paracentral_Lobule_L | -3.3499 | 0.0008 |
| Temporal_Pole_Sup_L | undefined | -3.4575 | 0.0005 |
| CON | Insula_R | undefined | -3.6459 | 0.0003 |
| AUD | SMN | Temporal_Sup_R | Supp_Motor_Area_R | -3.2423 | 0.0012 |
| Temporal_Sup_R | Precentral_R | -3.2961 | 0.0010 |
| Rolandic_Oper_L | Parietal_Inf_L | -3.4306 | 0.0006 |
| Rolandic_Oper_L | Supp_Motor_Area_R | -3.8880 | 0.0001 |
| Rolandic_Oper_L | Postcentral_R | -3.3499 | 0.0008 |
| Temporal_Sup_L | Precentral_R | -3.2692 | 0.0011 |
| Temporal_Sup_L | Postcentral_L | -3.6997 | 0.0002 |
| Temporal_Sup_L | Precentral_R | -3.4306 | 0.0006 |
| Temporal_Sup_L | Supp_Motor_Area_R | -3.3230 | 0.0009 |
| Temporal_Sup_L | Precentral_R | -4.0226 | 0.0001 |
| Temporal_Sup_L | undefined | -3.2961 | 0.0010 |
| Temporal_Sup_L | Postcentral_L | -3.3499 | 0.0008 |
| Temporal_Sup_L | Postcentral_L | -3.1616 | 0.0016 |
| SupraMarginal_L | Paracentral_Lobule_L | -3.2154 | 0.0013 |
| SupraMarginal_L | Precentral_R | -3.4037 | 0.0007 |
| SupraMarginal_L | Supp_Motor_Area_R | -3.1616 | 0.0016 |
| SupraMarginal_L | Paracentral_Lobule_L | -3.6190 | 0.0003 |
| SupraMarginal_L | Precentral_R | -3.3499 | 0.0008 |
| SupraMarginal_L | undefined | -3.1616 | 0.0016 |
| SupraMarginal_L | Supp_Motor_Area_R | -3.7266 | 0.0002 |
| SupraMarginal_L | Paracentral_Lobule_L | -3.8073 | 0.0001 |
| SupraMarginal_L | Precentral_R | -3.2692 | 0.0011 |
| Rolandic_Oper_L | Supp_Motor_Area_L | -3.2692 | 0.0011 |
| Rolandic_Oper_L | Supp_Motor_Area_R | -3.4306 | 0.0006 |
| Rolandic_Oper_L | Precentral_R | -3.4575 | 0.0005 |
| Rolandic_Oper_L | Postcentral_L | -3.4306 | 0.0006 |
| Rolandic_Oper_L | Supp_Motor_Area_R | -3.4575 | 0.0005 |
| Rolandic_Oper_R | Parietal_Inf_L | -3.3768 | 0.0007 |
| Rolandic_Oper_R | Postcentral_L | -3.6190 | 0.0003 |
| Rolandic_Oper_R | Paracentral_Lobule_L | -3.4037 | 0.0007 |
| Postcentral_R | Supp_Motor_Area_R | -3.2423 | 0.0012 |
| Postcentral_R | Precentral_R | -3.4037 | 0.0007 |
| AUD | Temporal_Sup_L | Temporal_Sup_R | -3.9150 | 0.0001 |
| SupraMarginal_L | Temporal_Sup_L | -3.4575 | 0.0005 |
| SupraMarginal_L | Temporal_Sup_L | -3.4844 | 0.0005 |
| Rolandic_Oper_R | Temporal_Sup_L | -3.6459 | 0.0003 |
| Postcentral_R | Rolandic_Oper_R | -3.2961 | 0.0010 |
| CON | Rolandic_Oper_L | Temporal_Pole_Sup_L | -3.5652 | 0.0004 |
| DMN | SMN | Occipital_Mid_L | Precuneus_L | -3.4844 | 0.0005 |
| Occipital_Mid_L | Supp_Motor_Area_L | -3.3499 | 0.0008 |
| Occipital_Mid_L | Supp_Motor_Area_R | -3.2692 | 0.0011 |
| Occipital_Mid_L | Parietal_Inf_L | -3.6459 | 0.0003 |
| Occipital_Mid_L | Postcentral_R | -3.1885 | 0.0014 |
| Occipital_Mid_L | Postcentral_L | -3.3768 | 0.0007 |
| Occipital_Mid_L | Postcentral_R | -3.3499 | 0.0008 |
| Rectus_R | Postcentral_R | -3.4037 | 0.0007 |
| Temporal_Mid_L | Precuneus_L | -3.5383 | 0.0004 |
| Temporal_Mid_L | Supp_Motor_Area_R | -3.6997 | 0.0002 |
| Temporal_Mid_L | Parietal_Inf_L | -3.8611 | 0.0001 |
| Temporal_Mid_L | Postcentral_R | -3.3230 | 0.0009 |
| Temporal_Mid_L | Postcentral_R | -4.0226 | 0.0001 |
| Temporal_Mid_L | Postcentral_L | -3.7804 | 0.0002 |
| Temporal_Mid_L | Supp_Motor_Area_R | -3.3768 | 0.0007 |
| Temporal_Mid_L | Postcentral_L | -3.4306 | 0.0006 |
| Temporal_Mid_L | Precentral_R | -3.8073 | 0.0001 |
| Temporal_Mid_L | Precentral_R | -3.4037 | 0.0007 |
| Temporal_Mid_L | Postcentral_R | -3.3768 | 0.0007 |
| Temporal_Mid_L | Postcentral_L | -3.1885 | 0.0014 |
| Occipital_Mid_R | Precuneus_L | -3.4306 | 0.0006 |
| Occipital_Mid_R | Supp_Motor_Area_R | -3.3499 | 0.0008 |
| Occipital_Mid_R | Postcentral_R | -3.2961 | 0.0010 |
| Occipital_Mid_R | Postcentral_R | -3.3768 | 0.0007 |
| Occipital_Mid_R | Postcentral_L | -3.1616 | 0.0016 |
| Temporal_Pole_Mid_R | Supp_Motor_Area_R | -3.2961 | 0.0010 |
| Temporal_Pole_Mid_R | Postcentral_R | -3.5114 | 0.0004 |
| Angular_L | Postcentral_R | -3.5114 | 0.0004 |
| Precuneus_L | Postcentral_R | -3.2961 | 0.0010 |
| Precuneus_L | Precuneus_L | -3.3230 | 0.0009 |
| Precuneus_L | Precentral_R | -3.3499 | 0.0008 |
| Precuneus_L | Postcentral_R | -3.5114 | 0.0004 |
| Precuneus_L | Postcentral_R | -3.4844 | 0.0005 |
| Precuneus_L | Postcentral_L | -3.2154 | 0.0013 |
| Precuneus_L | Precentral_R | -3.7266 | 0.0002 |
| Precuneus_L | Postcentral_R | -4.1033 | 0.0000 |
| Precuneus_L | Postcentral_L | -3.3499 | 0.0008 |
| Cingulum_Mid_R | Postcentral_R | -3.1885 | 0.0014 |
| Cingulum_Mid_R | Postcentral_R | -3.1616 | 0.0016 |
| Precuneus_R | Parietal_Inf_L | -3.1616 | 0.0016 |
| Precuneus_R | Postcentral_R | -3.7266 | 0.0002 |
| Precuneus_R | Postcentral_R | -3.9150 | 0.0001 |
| Precuneus_R | Insula_R | -3.4037 | 0.0007 |
| Frontal_Med_Orb_L | Postcentral_L | -3.7804 | 0.0002 |
| Frontal_Med_Orb_L | Postcentral_R | -3.3768 | 0.0007 |
| Temporal_Mid_R | Precuneus_L | -3.2154 | 0.0013 |
| Temporal_Mid_L | Supp_Motor_Area_R | -3.4575 | 0.0005 |
| Temporal_Mid_L | Postcentral_R | -3.5114 | 0.0004 |
| Temporal_Mid_L | Postcentral_L | -3.2423 | 0.0012 |
| Temporal_Mid_L | Insula_R | -3.1885 | 0.0014 |
| Temporal_Mid_L | Precuneus_L | -3.1616 | 0.0016 |
| Temporal_Mid_L | undefined | -3.2154 | 0.0013 |
| Temporal_Mid_L | Supp_Motor_Area_R | -3.7266 | 0.0002 |
| Temporal_Mid_L | Parietal_Inf_L | -3.1616 | 0.0016 |
| Temporal_Mid_L | Postcentral_R | -3.2961 | 0.0010 |
| Temporal_Mid_L | Postcentral_R | -3.2423 | 0.0012 |
| Temporal_Mid_L | Postcentral_L | -3.2154 | 0.0013 |
| Temporal_Mid_R | Supp_Motor_Area_R | -3.2423 | 0.0012 |
| Temporal_Mid_R | Postcentral_L | -3.5921 | 0.0003 |
| ParaHippocampal_L | Parietal_Inf_L | -3.1616 | 0.0016 |
| ParaHippocampal_L | Postcentral_R | -3.6997 | 0.0002 |
| ParaHippocampal_L | Postcentral_L | -3.4037 | 0.0007 |
| ParaHippocampal_L | Precentral_R | -3.4306 | 0.0006 |
| ParaHippocampal_L | Postcentral_R | -3.3768 | 0.0007 |
| Fusiform_R | Precuneus_L | -3.5114 | 0.0004 |
| Fusiform_R | Supp_Motor_Area_R | -3.5921 | 0.0003 |
| Fusiform_L | Postcentral_R | -3.6190 | 0.0003 |
| Fusiform_L | Postcentral_L | -3.5921 | 0.0003 |
| Temporal_Pole_Mid_R | Postcentral_R | -3.1885 | 0.0014 |
| Temporal_Pole_Mid_R | Paracentral_Lobule_L | -3.6997 | 0.0002 |
| Temporal_Mid_L | Postcentral_L | -3.2423 | 0.0012 |
| Temporal_Mid_L | Supp_Motor_Area_R | -3.9957 | 0.0001 |
| Temporal_Mid_L | Paracentral_Lobule_L | -3.2692 | 0.0011 |
| Temporal_Mid_L | Precentral_R | -3.1616 | 0.0016 |
| Temporal_Mid_L | Postcentral_L | -3.1885 | 0.0014 |
| Temporal_Mid_L | Supp_Motor_Area_R | -3.2692 | 0.0011 |
| Temporal_Mid_L | Precentral_R | -3.5114 | 0.0004 |
| Temporal_Mid_L | Insula_R | -3.1885 | 0.0014 |
| Frontal_Inf_Orb_L | Precuneus_R | -3.5383 | 0.0004 |
| DMN | Temporal_Pole_Mid_R | Temporal_Mid_L | -3.2154 | 0.0013 |
| Angular_R | Precuneus_L | -3.2154 | 0.0013 |
| Temporal_Mid_L | Precuneus_R | -3.5383 | 0.0004 |
| Temporal_Mid_R | Precuneus_L | -3.2961 | 0.0010 |
| Temporal_Mid_R | Frontal_Med_Orb_L | -3.2423 | 0.0012 |
| Temporal_Mid_R | Temporal_Mid_L | -3.2154 | 0.0013 |
| ParaHippocampal_L | Temporal_Mid_L | -3.3499 | 0.0008 |
| Temporal_Mid_L | Angular_L | -3.3768 | 0.0007 |
| Temporal_Mid_L | Temporal_Mid_L | -3.4844 | 0.0005 |
| AUD | Occipital_Mid_L | Temporal_Sup_R | -3.5652 | 0.0004 |
| Occipital_Mid_L | Temporal_Sup_L | -3.3768 | 0.0007 |
| Occipital_Mid_R | Temporal_Sup_R | -3.2692 | 0.0011 |
| Occipital_Mid_R | Rolandic_Oper_L | -3.3768 | 0.0007 |
| Occipital_Mid_R | undefined | -3.3230 | 0.0009 |
| Temporal_Pole_Mid_R | Temporal_Sup_L | -3.3230 | 0.0009 |
| Temporal_Pole_Mid_R | Postcentral_R | -3.5921 | 0.0003 |
| Precuneus_L | Rolandic_Oper_L | -3.2423 | 0.0012 |
| Precuneus_L | SupraMarginal_L | -3.4575 | 0.0005 |
| Precuneus_R | Temporal_Sup_L | -3.7266 | 0.0002 |
| Precuneus_R | undefined | -3.2961 | 0.0010 |
| Cingulum_Mid_L | Postcentral_R | -3.1616 | 0.0016 |
| Precuneus_R | Temporal_Sup_R | -3.3499 | 0.0008 |
| Precuneus_R | Temporal_Sup_L | -3.5921 | 0.0003 |
| Precuneus_R | undefined | -3.3768 | 0.0007 |
| Frontal_Sup_R | undefined | -3.6190 | 0.0003 |
| Temporal_Mid_R | Temporal_Sup_R | -3.2961 | 0.0010 |
| Temporal_Mid_L | Temporal_Sup_R | -3.1885 | 0.0014 |
| Temporal_Mid_L | Temporal_Sup_L | -3.5383 | 0.0004 |
| Temporal_Mid_L | Temporal_Sup_L | -3.2692 | 0.0011 |
| Temporal_Mid_L | SupraMarginal_L | -3.4844 | 0.0005 |
| Temporal_Mid_L | Rolandic_Oper_L | -3.5383 | 0.0004 |
| Temporal_Mid_L | Rolandic_Oper_L | -3.3499 | 0.0008 |
| Temporal_Mid_L | Temporal_Sup_L | -3.4306 | 0.0006 |
| Temporal_Mid_L | Temporal_Sup_L | -3.2692 | 0.0011 |
| Temporal_Mid_R | Rolandic_Oper_L | -3.9688 | 0.0001 |
| Temporal_Mid_R | Temporal_Sup_L | -3.3499 | 0.0008 |
| Temporal_Mid_R | Temporal_Sup_L | -3.4306 | 0.0006 |
| Temporal_Mid_R | Rolandic_Oper_L | -3.4037 | 0.0007 |
| Fusiform_R | Temporal_Sup_R | -3.2423 | 0.0012 |
| Temporal_Mid_L | Rolandic_Oper_L | -3.5114 | 0.0004 |
| CON | Occipital_Mid_L | Frontal_Sup_R | -3.3499 | 0.0008 |
| Occipital_Mid_L | Cingulum_Mid_L | -3.1616 | 0.0016 |
| Temporal_Mid_L | Frontal_Sup_R | -3.6190 | 0.0003 |
| Temporal_Mid_L | Cingulum_Mid_L | -3.6459 | 0.0003 |
| Temporal_Pole_Mid_L | Supp_Motor_Area_R | -3.3768 | 0.0007 |
| Angular_L | Frontal_Sup_R | -3.4575 | 0.0005 |
| Precuneus_L | Frontal_Sup_R | -3.5652 | 0.0004 |
| Precuneus_R | SupraMarginal_R | -3.1885 | 0.0014 |
| Temporal_Mid_L | Frontal_Sup_R | -3.6190 | 0.0003 |
| Temporal_Mid_L | Cingulum_Mid_L | -3.3230 | 0.0009 |
| Temporal_Mid_R | Frontal_Sup_R | -3.1885 | 0.0014 |
| ParaHippocampal_L | Temporal_Pole_Sup_L | -3.6190 | 0.0003 |
| Temporal_Mid_L | Frontal_Sup_R | -3.4844 | 0.0005 |
| Temporal_Mid_L | Supp_Motor_Area_R | -3.8073 | 0.0001 |
| VIN | SMN | Lingual_R | Precuneus_L | -3.2961 | 0.0010 |
| Occipital_Mid_R | Precuneus_L | -4.0764 | 0.0000 |
| Occipital_Mid_R | Postcentral_R | -3.9150 | 0.0001 |
| Occipital_Mid_R | Postcentral_L | -3.6459 | 0.0003 |
| Occipital_Mid_R | Postcentral_R | -3.8611 | 0.0001 |
| Occipital_Mid_R | Postcentral_L | -3.4037 | 0.0007 |
| Lingual_R | Parietal_Inf_L | -3.9688 | 0.0001 |
| Lingual_R | Postcentral_R | -3.2423 | 0.0012 |
| Lingual_R | Postcentral_R | -3.4844 | 0.0005 |
| Fusiform_R | Precentral_R | -3.2961 | 0.0010 |
| Lingual_L | Precuneus_L | -3.1885 | 0.0014 |
| Calcarine_L | Parietal_Inf_L | -3.3499 | 0.0008 |
| Occipital_Mid_R | Precuneus_L | -3.1616 | 0.0016 |
| Occipital_Mid_R | Parietal_Inf_L | -3.1885 | 0.0014 |
| Cuneus_R | Postcentral_L | -3.6997 | 0.0002 |
| Cuneus_R | Supp_Motor_Area_R | -3.3499 | 0.0008 |
| Lingual_L | Precuneus_L | -3.2423 | 0.0012 |
| Cuneus_R | Precentral_R | -3.4844 | 0.0005 |
| Cuneus_R | Postcentral_R | -3.4844 | 0.0005 |
| Cuneus_R | Supp_Motor_Area_R | -3.3230 | 0.0009 |
| Cuneus_L | Postcentral_L | -3.7266 | 0.0002 |
| Cuneus_L | Precuneus_L | -3.1885 | 0.0014 |
| Cuneus_L | Supp_Motor_Area_R | -3.1616 | 0.0016 |
| Cuneus_L | Supp_Motor_Area_R | -3.5383 | 0.0004 |
| Cuneus_L | Precentral_R | -3.3499 | 0.0008 |
| VIN | Lingual_L | Occipital_Mid_R | -3.1616 | 0.0016 |
| Cuneus_R | Occipital_Mid_R | -3.3499 | 0.0008 |
| Cuneus_L | Occipital_Mid_R | -3.2423 | 0.0012 |
| Cuneus_L | Occipital_Mid_R | -3.6190 | 0.0003 |
| Cuneus_L | Occipital_Mid_L | -3.3499 | 0.0008 |
| Cuneus_L | Occipital_Mid_R | -3.2154 | 0.0013 |
| Cuneus_L | Cuneus_R | -3.9150 | 0.0001 |
| Cuneus_L | Occipital_Sup_R | -3.3768 | 0.0007 |
| Cuneus_L | Cuneus_R | -3.4037 | 0.0007 |
| Cuneus_L | Cuneus_L | -3.5921 | 0.0003 |
| DMN | Lingual_R | Occipital_Mid_L | -3.1616 | 0.0016 |
| Lingual_R | Occipital_Mid_R | -3.2154 | 0.0013 |
| Occipital_Mid_R | Occipital_Mid_L | -3.1885 | 0.0014 |
| Calcarine_R | Occipital_Mid_R | -3.4575 | 0.0005 |
| Calcarine_L | Occipital_Mid_L | -3.2154 | 0.0013 |
| Calcarine_L | Occipital_Mid_R | -3.7804 | 0.0002 |
| Calcarine_L | Fusiform_R | -3.6728 | 0.0002 |
| Occipital_Mid_L | Occipital_Mid_L | -3.7804 | 0.0002 |
| Lingual_R | Occipital_Mid_L | -3.4037 | 0.0007 |
| Lingual_R | Occipital_Mid_R | -3.7804 | 0.0002 |
| Lingual_R | Temporal_Mid_R | -3.1616 | 0.0016 |
| Occipital_Mid_L | Occipital_Mid_L | -3.4037 | 0.0007 |
| Lingual_L | Occipital_Mid_L | -3.3499 | 0.0008 |
| Calcarine_L | Occipital_Mid_R | -3.9150 | 0.0001 |
| Calcarine_L | Temporal_Mid_R | -3.2423 | 0.0012 |
| Calcarine_L | Temporal_Mid_R | -3.4575 | 0.0005 |
| Occipital_Sup_L | Occipital_Mid_L | -3.1616 | 0.0016 |
| Occipital_Sup_L | Temporal_Mid_L | -3.1885 | 0.0014 |
| Occipital_Sup_L | Temporal_Mid_L | -3.1885 | 0.0014 |
| Cuneus_R | Fusiform_R | -3.2423 | 0.0012 |
| Occipital_Mid_R | Cingulum_Mid_L | -3.2154 | 0.0013 |
| Occipital_Mid_R | Frontal_Med_Orb_R | -3.5383 | 0.0004 |
| Cuneus_R | Occipital_Mid_L | -3.3230 | 0.0009 |
| Cuneus_R | Precuneus_R | -3.4575 | 0.0005 |
| Cuneus_R | Temporal_Mid_L | -3.3230 | 0.0009 |
| Cuneus_R | Fusiform_R | -3.1616 | 0.0016 |
| Cuneus_R | Fusiform_L | -3.6190 | 0.0003 |
| Lingual_L | Occipital_Mid_R | -3.2961 | 0.0010 |
| Occipital_Sup_R | Occipital_Mid_L | -3.5383 | 0.0004 |
| Occipital_Sup_R | Temporal_Mid_L | -3.4306 | 0.0006 |
| Cuneus_R | Occipital_Mid_L | -3.2423 | 0.0012 |
| Cuneus_R | Frontal_Sup_L | -3.1616 | 0.0016 |
| Cuneus_R | Temporal_Mid_L | -3.6728 | 0.0002 |
| Cuneus_R | Temporal_Mid_L | -3.3230 | 0.0009 |
| Cuneus_R | ParaHippocampal_L | -3.2423 | 0.0012 |
| Cuneus_R | Temporal_Mid_L | -3.6997 | 0.0002 |
| Occipital_Mid_L | Occipital_Mid_L | -3.2961 | 0.0010 |
| Occipital_Mid_L | Precuneus_R | -3.1885 | 0.0014 |
| Occipital_Mid_L | Cingulum_Mid_L | -3.2154 | 0.0013 |
| Occipital_Mid_L | Cingulum_Ant_L | -3.4037 | 0.0007 |
| Cuneus_L | Occipital_Mid_L | -4.3724 | 0.0000 |
| Cuneus_L | Occipital_Mid_R | -3.2692 | 0.0011 |
| Cuneus_L | Frontal_Sup_L | -3.8611 | 0.0001 |
| Cuneus_L | Temporal_Mid_L | -3.7266 | 0.0002 |
| Cuneus_L | Temporal_Mid_L | -3.7535 | 0.0002 |
| Cuneus_L | Temporal_Mid_L | -3.3768 | 0.0007 |
| Cuneus_L | Temporal_Mid_R | -3.4844 | 0.0005 |
| Cuneus_L | Fusiform_R | -3.5652 | 0.0004 |
| Cuneus_L | Occipital_Mid_L | -3.2692 | 0.0011 |
| Cuneus_L | ParaHippocampal_L | -3.9957 | 0.0001 |
| Cuneus_L | Temporal_Mid_L | -3.4575 | 0.0005 |
| Occipital_Mid_L | Angular_R | -3.5383 | 0.0004 |
| Occipital_Mid_L | Frontal_Sup_Medial_L | -3.2692 | 0.0011 |
| Calcarine_R | Occipital_Mid_R | -3.2692 | 0.0011 |
| Fusiform_L | Angular_R | -3.1885 | 0.0014 |
| Occipital_Mid_R | Temporal_Mid_L | -3.2961 | 0.0010 |
| AUD | Lingual_R | Postcentral_R | -3.2692 | 0.0011 |
| Lingual_L | Temporal_Sup_L | -3.3768 | 0.0007 |
| Lingual_L | SupraMarginal_L | -3.9957 | 0.0001 |
| Calcarine_L | Temporal_Sup_L | -3.2961 | 0.0010 |
| Cuneus_R | Postcentral_R | -3.2154 | 0.0013 |
| Cuneus_R | Temporal_Sup_R | -3.5652 | 0.0004 |
| Cuneus_R | Rolandic_Oper_L | -3.4844 | 0.0005 |
| Cuneus_R | Temporal_Sup_L | -3.7535 | 0.0002 |
| Cuneus_R | Postcentral_R | -3.5383 | 0.0004 |
| Cuneus_R | undefined | -3.6190 | 0.0003 |
| Occipital_Sup_R | Temporal_Sup_L | -3.3768 | 0.0007 |
| Cuneus_R | Rolandic_Oper_L | -3.2423 | 0.0012 |
| Cuneus_R | Temporal_Sup_L | -3.8880 | 0.0001 |
| Cuneus_R | Postcentral_R | -3.4306 | 0.0006 |
| Cuneus_L | Rolandic_Oper_L | -3.6728 | 0.0002 |
| CON | Lingual_R | SupraMarginal_R | -3.5114 | 0.0004 |
| Lingual_R | undefined | -3.6459 | 0.0003 |
| Lingual_L | SupraMarginal_R | -3.3768 | 0.0007 |
| Cuneus_L | Temporal_Pole_Sup_L | -3.2154 | 0.0013 |
| FPN | SMN | Precentral_L | Precuneus_L | -3.4844 | 0.0005 |
| Precentral_L | Supp_Motor_Area_L | -3.6728 | 0.0002 |
| Precentral_L | Parietal_Inf_L | -3.8342 | 0.0001 |
| Precentral_L | Precentral_L | -3.2154 | 0.0013 |
| Precentral_L | Postcentral_R | -3.5652 | 0.0004 |
| Precentral_L | undefined | -3.9150 | 0.0001 |
| Precentral_L | Postcentral_L | -3.4844 | 0.0005 |
| Precentral_L | Postcentral_L | -3.1885 | 0.0014 |
| Precentral_L | Postcentral_R | -3.5383 | 0.0004 |
| Precentral_L | Postcentral_R | -3.2961 | 0.0010 |
| Frontal_Inf_Tri_L | Precuneus_L | -3.9688 | 0.0001 |
| Frontal_Inf_Tri_L | Supp_Motor_Area_L | -4.0764 | 0.0000 |
| Frontal_Inf_Tri_L | Supp_Motor_Area_R | -3.8342 | 0.0001 |
| Frontal_Inf_Tri_L | Insula_R | -3.3768 | 0.0007 |
| Precentral_R | Supp_Motor_Area_R | -3.2961 | 0.0010 |
| Precentral_R | Postcentral_L | -3.1885 | 0.0014 |
| Parietal_Inf_L | Supp_Motor_Area_L | -3.1616 | 0.0016 |
| Frontal_Mid_Orb_L | Supp_Motor_Area_L | -3.5114 | 0.0004 |
| Frontal_Mid_Orb_L | Supp_Motor_Area_R | -3.1885 | 0.0014 |
| Frontal_Inf_Tri_L | Supp_Motor_Area_L | -3.7535 | 0.0002 |
| VIN | Frontal_Mid_Orb_R | Cuneus_R | -3.1616 | 0.0016 |
| Parietal_Inf_R | Occipital_Inf_L | -3.2154 | 0.0013 |
| Parietal_Inf_R | Occipital_Mid_L | -3.7266 | 0.0002 |
| Parietal_Inf_R | Occipital_Mid_L | -3.2961 | 0.0010 |
| Parietal_Inf_R | Fusiform_L | -3.3230 | 0.0009 |
| Parietal_Inf_R | Fusiform_L | -3.5652 | 0.0004 |
| Frontal_Mid_R | Occipital_Mid_L | -3.4575 | 0.0005 |
| Frontal_Mid_L | Occipital_Mid_L | -3.3230 | 0.0009 |
| Frontal_Mid_L | Occipital_Mid_L | -3.2154 | 0.0013 |
| DMN | Precentral_L | Occipital_Mid_L | -3.3230 | 0.0009 |
| Precentral_L | Precuneus_R | -3.2423 | 0.0012 |
| Precentral_L | Temporal_Mid_R | -3.3768 | 0.0007 |
| Frontal_Inf_Tri_L | ParaHippocampal_L | -3.3230 | 0.0009 |
| Precentral_L | Precuneus_L | -3.5114 | 0.0004 |
| Frontal_Mid_Orb_L | Precuneus_L | -3.2423 | 0.0012 |
| Frontal_Mid_Orb_L | Frontal_Med_Orb_R | -3.2423 | 0.0012 |
| AUD | Precentral_L | Temporal_Sup_R | -3.2154 | 0.0013 |
| Precentral_L | Temporal_Sup_L | -3.3230 | 0.0009 |
| Precentral_L | SupraMarginal_L | -3.3768 | 0.0007 |
| Precentral_L | Rolandic_Oper_R | -3.8342 | 0.0001 |
| Precentral_L | Postcentral_R | -3.5652 | 0.0004 |
| Frontal_Inf_Tri_R | SupraMarginal_L | -3.6997 | 0.0002 |
| Frontal_Inf_Tri_R | undefined | -3.5383 | 0.0004 |
| Frontal_Inf_Tri_L | Temporal_Sup_R | -3.8342 | 0.0001 |
| Frontal_Inf_Tri_L | Rolandic_Oper_R | -3.1885 | 0.0014 |
| Frontal_Inf_Tri_L | SupraMarginal_L | -3.6459 | 0.0003 |
| Frontal_Inf_Tri_L | SupraMarginal_L | -3.6459 | 0.0003 |
| Frontal_Mid_Orb_R | Temporal_Sup_R | -3.4844 | 0.0005 |
| Precentral_R | SupraMarginal_L | -3.7804 | 0.0002 |
| Precentral_R | undefined | -3.3768 | 0.0007 |
| Angular_R | undefined | -3.2423 | 0.0012 |
| Frontal_Mid_Orb_L | SupraMarginal_L | -3.2154 | 0.0013 |
| CON | Frontal_Inf_Tri_L | Rolandic_Oper_L | -3.1885 | 0.0014 |
| Frontal_Inf_Tri_L | Temporal_Pole_Sup_L | -3.2692 | 0.0011 |
| Precentral_R | undefined | -3.2692 | 0.0011 |
| Parietal_Inf_L | undefined | -3.2423 | 0.0012 |
| Parietal_Inf_L | Temporal_Pole_Sup_L | -3.2961 | 0.0010 |
| Parietal_Inf_L | undefined | -3.7266 | 0.0002 |
| Angular_R | SupraMarginal_R | -3.4844 | 0.0005 |
| Frontal_Inf_Tri_L | Frontal_Sup_R | -3.2154 | 0.0013 |
| Frontal_Sup_Medial_L | Supp_Motor_Area_R | -3.2961 | 0.0010 |
| Frontal_Sup_Medial_L | undefined | -3.1885 | 0.0014 |
| SAN | SMN | Cingulum_Mid_R | Precentral_R | -3.1885 | 0.0014 |
| Cingulum_Mid_R | Postcentral_L | -3.3499 | 0.0008 |
| Cingulum_Mid_R | undefined | -3.9419 | 0.0001 |
| Cingulum_Mid_R | Precentral_R | -3.5114 | 0.0004 |
| Cingulum_Mid_R | Postcentral_R | -3.5921 | 0.0003 |
| Precentral_R | Supp_Motor_Area_R | -3.8880 | 0.0001 |
| Precentral_R | Postcentral_R | -3.1616 | 0.0016 |
| Insula_L | Insula_R | -3.6190 | 0.0003 |
| SAN | Supp_Motor_Area_L | Insula_L | -3.1616 | 0.0016 |
| FPN | Cingulum_Mid_R | Precentral_L | -3.5383 | 0.0004 |
| Cingulum_Mid_R | Frontal_Mid_Orb_R | -3.1885 | 0.0014 |
| Cingulum_Mid_R | Precentral_R | -3.5383 | 0.0004 |
| Cingulum_Mid_R | Parietal_Inf_L | -3.5114 | 0.0004 |
| Cingulum_Mid_R | Angular_R | -3.9688 | 0.0001 |
| Cingulum_Mid_R | Frontal_Inf_Tri_L | -3.5921 | 0.0003 |
| Insula_L | Parietal_Inf_L | -3.1885 | 0.0014 |
| Insula_R | Parietal_Inf_L | -3.7535 | 0.0002 |
| Supp_Motor_Area_L | Parietal_Inf_L | -3.2961 | 0.0010 |
| Cingulum_Ant_L | Angular_R | -3.5114 | 0.0004 |
| Frontal_Mid_L | Frontal_Mid_Orb_R | -3.2692 | 0.0011 |
| VIN | Cingulum_Mid_R | Lingual_R | -3.5652 | 0.0004 |
| Cingulum_Mid_R | Occipital_Mid_R | -3.5652 | 0.0004 |
| Cingulum_Mid_R | Calcarine_R | -3.6190 | 0.0003 |
| Cingulum_Mid_R | Calcarine_L | -4.0495 | 0.0001 |
| Cingulum_Mid_R | Lingual_R | -3.5383 | 0.0004 |
| Cingulum_Mid_R | Fusiform_R | -3.4037 | 0.0007 |
| Cingulum_Mid_R | Lingual_L | -3.4844 | 0.0005 |
| Cingulum_Mid_R | Calcarine_L | -3.5921 | 0.0003 |
| Cingulum_Mid_R | Cuneus_R | -3.7535 | 0.0002 |
| Cingulum_Mid_R | Cuneus_R | -3.8073 | 0.0001 |
| Cingulum_Mid_R | Cuneus_L | -3.4844 | 0.0005 |
| Parietal_Inf_R | Occipital_Mid_L | -3.5383 | 0.0004 |
| Parietal_Inf_R | Occipital_Mid_L | -3.4844 | 0.0005 |
| Frontal_Inf_Tri_R | Calcarine_R | -4.0226 | 0.0001 |
| Frontal_Inf_Tri_R | Lingual_R | -3.1885 | 0.0014 |
| Frontal_Inf_Tri_R | Calcarine_L | -3.1885 | 0.0014 |
| Frontal_Inf_Tri_R | Cuneus_R | -3.5383 | 0.0004 |
| Frontal_Inf_Tri_R | Calcarine_R | -3.5921 | 0.0003 |
| Insula_L | Calcarine_R | -3.6728 | 0.0002 |
| Insula_L | Calcarine_L | -3.4306 | 0.0006 |
| Insula_R | Calcarine_R | -4.2647 | 0.0000 |
| Insula_R | Calcarine_L | -3.8880 | 0.0001 |
| Insula_R | Calcarine_R | -3.1885 | 0.0014 |
| undefined | Calcarine_L | -3.3499 | 0.0008 |
| Cingulum_Ant_L | Occipital_Mid_L | -3.4306 | 0.0006 |
| Frontal_Mid_R | Occipital_Mid_L | -3.2154 | 0.0013 |
| Frontal_Mid_R | Occipital_Mid_L | -3.2692 | 0.0011 |
| DMN | Cingulum_Mid_R | Occipital_Mid_L | -3.2423 | 0.0012 |
| Cingulum_Mid_R | Occipital_Mid_R | -4.0764 | 0.0000 |
| Cingulum_Mid_R | Precuneus_L | -3.2423 | 0.0012 |
| Cingulum_Mid_R | Temporal_Mid_R | -3.4844 | 0.0005 |
| Cingulum_Mid_R | Fusiform_R | -3.3499 | 0.0008 |
| Cingulum_Mid_R | Temporal_Mid_L | -3.4575 | 0.0005 |
| Precentral_R | Precuneus_R | -3.2961 | 0.0010 |
| Precentral_R | Temporal_Mid_L | -3.3499 | 0.0008 |
| Insula_L | Precuneus_R | -3.2961 | 0.0010 |
| Frontal_Inf_Orb_R | Cingulum_Ant_R | -3.1885 | 0.0014 |
| undefined | Precuneus_L | -3.1616 | 0.0016 |
| Cingulum_Mid_R | Cingulum_Ant_R | -3.2423 | 0.0012 |
| Cingulum_Ant_R | Rectus_R | -3.1885 | 0.0014 |
| Cingulum_Ant_R | Occipital_Mid_R | -3.2961 | 0.0010 |
| Cingulum_Ant_R | Cingulum_Ant_R | -3.2154 | 0.0013 |
| AUD | Cingulum_Mid_R | Rolandic_Oper_L | -3.5921 | 0.0003 |
| Cingulum_Mid_R | Temporal_Sup_L | -3.7266 | 0.0002 |
| Cingulum_Mid_R | Postcentral_R | -3.2154 | 0.0013 |
| Precentral_R | Temporal_Sup_R | -3.5921 | 0.0003 |
| Frontal_Inf_Tri_R | undefined | -3.9419 | 0.0001 |
| Frontal_Inf_Tri_R | Temporal_Sup_L | -3.2423 | 0.0012 |
| Frontal_Inf_Orb_R | Rolandic_Oper_R | -3.3499 | 0.0008 |
| CON | Precentral_R | Rolandic_Oper_L | -3.1885 | 0.0014 |
| Frontal_Inf_Tri_R | undefined | -3.2154 | 0.0013 |
| SUB | FPN | Putamen_L | Parietal_Inf_L | -3.6728 | 0.0002 |
| Putamen_R | Frontal_Mid_Orb_R | -3.3499 | 0.0008 |
| Putamen_R | Frontal_Mid_Orb_R | -3.8342 | 0.0001 |
| undefined | Frontal_Mid_Orb_R | -3.2154 | 0.0013 |
| VIN | Thalamus_L | Fusiform_R | -3.2961 | 0.0010 |
| Thalamus_R | Calcarine_R | -3.5921 | 0.0003 |
| Thalamus_R | Calcarine_R | -3.6459 | 0.0003 |
| undefined | Calcarine_R | -3.2961 | 0.0010 |
| DMN | Putamen_L | Frontal_Sup_Medial_L | -3.2692 | 0.0011 |
| Putamen_R | Frontal_Mid_L | -3.2692 | 0.0011 |
| Putamen_R | Frontal_Sup_L | -3.2692 | 0.0011 |
| VAN | SMN | Temporal_Mid_L | undefined | -3.6728 | 0.0002 |
| Temporal_Mid_L | Precentral_R | -3.2423 | 0.0012 |
| Temporal_Mid_L | undefined | -3.5652 | 0.0004 |
| Temporal_Mid_L | Precentral_R | -3.7266 | 0.0002 |
| Temporal_Mid_L | Precentral_R | -3.8611 | 0.0001 |
| Temporal_Mid_L | Postcentral_R | -3.2423 | 0.0012 |
| Temporal_Sup_L | Paracentral_Lobule_L | -3.4844 | 0.0005 |
| Temporal_Sup_L | Precentral_R | -3.1616 | 0.0016 |
| Temporal_Sup_L | Precentral_R | -3.9688 | 0.0001 |
| Temporal_Sup_L | Postcentral_L | -3.7535 | 0.0002 |
| Temporal_Sup_L | Precentral_R | -3.7535 | 0.0002 |
| Temporal_Sup_L | Supp_Motor_Area_R | -3.7535 | 0.0002 |
| Temporal_Sup_L | Postcentral_R | -3.3768 | 0.0007 |
| Temporal_Sup_R | Supp_Motor_Area_R | -3.3499 | 0.0008 |
| Temporal_Sup_R | Precentral_R | -3.4037 | 0.0007 |
| Temporal_Sup_R | undefined | -3.7535 | 0.0002 |
| Temporal_Sup_R | Supp_Motor_Area_R | -3.2423 | 0.0012 |
| Temporal_Sup_R | Postcentral_R | -3.7804 | 0.0002 |
| Temporal_Mid_R | Precuneus_L | -3.5383 | 0.0004 |
| Temporal_Mid_R | Supp_Motor_Area_R | -3.4306 | 0.0006 |
| Temporal_Mid_R | undefined | -3.7804 | 0.0002 |
| Temporal_Mid_R | undefined | -3.3230 | 0.0009 |
| Frontal_Inf_Tri_L | Precuneus_L | -3.1885 | 0.0014 |
| Frontal_Inf_Tri_L | undefined | -3.2154 | 0.0013 |
| VAN | Temporal_Sup_L | Temporal_Mid_L | -3.5114 | 0.0004 |
| Temporal_Sup_R | Temporal_Mid_L | -3.9688 | 0.0001 |
| Temporal_Sup_R | Temporal_Sup_L | -3.6728 | 0.0002 |
| Temporal_Mid_R | Temporal_Sup_L | -3.5652 | 0.0004 |
| Frontal_Inf_Tri_L | Temporal_Sup_L | -3.3499 | 0.0008 |
| SAN | Temporal_Mid_L | Cingulum_Mid_R | -3.4037 | 0.0007 |
| Temporal_Sup_L | Frontal_Inf_Orb_R | -3.4575 | 0.0005 |
| Temporal_Sup_R | Cingulum_Mid_R | -3.3768 | 0.0007 |
| Temporal_Sup_R | Frontal_Inf_Tri_R | -3.1885 | 0.0014 |
| Temporal_Sup_R | Frontal_Inf_Orb_R | -3.4306 | 0.0006 |
| Temporal_Mid_R | Cingulum_Mid_R | -3.5114 | 0.0004 |
| Temporal_Mid_R | Frontal_Inf_Orb_R | -3.1885 | 0.0014 |
| FPN | Temporal_Sup_R | Frontal_Mid_Orb_R | -3.1616 | 0.0016 |
| Temporal_Mid_L | Precentral_L | -3.4037 | 0.0007 |
| Temporal_Sup_L | Precentral_L | -4.0764 | 0.0000 |
| Temporal_Sup_R | Precentral_L | -3.8342 | 0.0001 |
| Temporal_Sup_R | Frontal_Inf_Tri_L | -3.8342 | 0.0001 |
| Temporal_Sup_R | Frontal_Mid_Orb_R | -3.7266 | 0.0002 |
| VIN | Temporal_Mid_L | Lingual_R | -4.0764 | 0.0000 |
| Temporal_Mid_L | Lingual_L | -3.5114 | 0.0004 |
| Temporal_Mid_L | Occipital_Sup_L | -3.6190 | 0.0003 |
| Temporal_Mid_L | Occipital_Mid_R | -3.3768 | 0.0007 |
| Temporal_Mid_L | Cuneus_R | -4.0226 | 0.0001 |
| Temporal_Mid_L | Lingual_L | -3.6190 | 0.0003 |
| Temporal_Mid_L | Occipital_Sup_R | -3.7266 | 0.0002 |
| Temporal_Mid_L | Cuneus_R | -3.3499 | 0.0008 |
| Temporal_Mid_L | Cuneus_L | -4.0226 | 0.0001 |
| Temporal_Mid_L | Cuneus_L | -3.5114 | 0.0004 |
| Temporal_Sup_L | Lingual_L | -3.4037 | 0.0007 |
| Temporal_Sup_L | Cuneus_R | -3.2423 | 0.0012 |
| Temporal_Sup_L | Lingual_L | -3.1885 | 0.0014 |
| Temporal_Sup_L | Cuneus_R | -3.4575 | 0.0005 |
| Temporal_Sup_L | Cuneus_L | -3.5383 | 0.0004 |
| Temporal_Sup_R | Lingual_R | -3.3230 | 0.0009 |
| Temporal_Sup_R | Lingual_L | -3.9688 | 0.0001 |
| Temporal_Sup_R | Cuneus_R | -3.3499 | 0.0008 |
| Temporal_Sup_R | Occipital_Sup_R | -3.3499 | 0.0008 |
| Temporal_Sup_R | Cuneus_R | -3.3499 | 0.0008 |
| Temporal_Sup_R | Cuneus_L | -3.4575 | 0.0005 |
| Temporal_Sup_R | Cuneus_L | -3.8611 | 0.0001 |
| Temporal_Mid_R | Lingual_R | -3.2154 | 0.0013 |
| Temporal_Mid_R | Lingual_L | -3.3768 | 0.0007 |
| Temporal_Mid_R | Calcarine_L | -3.3230 | 0.0009 |
| Temporal_Mid_R | Cuneus_R | -3.7535 | 0.0002 |
| Temporal_Mid_R | Lingual_L | -3.6190 | 0.0003 |
| Temporal_Mid_R | Cuneus_R | -3.6728 | 0.0002 |
| Temporal_Mid_R | Cuneus_L | -3.4306 | 0.0006 |
| Temporal_Mid_R | Cuneus_L | -3.4306 | 0.0006 |
| DMN | Temporal_Sup_R | Occipital_Mid_L | -3.2692 | 0.0011 |
| Temporal_Sup_R | Precuneus_R | -3.3768 | 0.0007 |
| Temporal_Mid_L | Temporal_Mid_L | -3.8611 | 0.0001 |
| Temporal_Mid_L | Occipital_Mid_R | -3.5383 | 0.0004 |
| Temporal_Mid_L | Precuneus_L | -3.9688 | 0.0001 |
| Temporal_Mid_L | Precuneus_L | -4.0764 | 0.0000 |
| Temporal_Mid_L | Precuneus_R | -3.8880 | 0.0001 |
| Temporal_Mid_L | Precuneus_R | -4.0764 | 0.0000 |
| Temporal_Mid_L | Frontal_Med_Orb_L | -3.8342 | 0.0001 |
| Temporal_Mid_L | Temporal_Mid_L | -3.7804 | 0.0002 |
| Temporal_Mid_L | Temporal_Mid_R | -3.5652 | 0.0004 |
| Temporal_Mid_L | ParaHippocampal_L | -3.6459 | 0.0003 |
| Temporal_Mid_L | Fusiform_R | -3.4037 | 0.0007 |
| Temporal_Mid_L | Temporal_Mid_L | -3.6190 | 0.0003 |
| Temporal_Sup_L | Temporal_Mid_L | -3.6190 | 0.0003 |
| Temporal_Sup_L | Temporal_Pole_Mid_R | -3.5114 | 0.0004 |
| Temporal_Sup_L | Temporal_Mid_L | -3.5114 | 0.0004 |
| Temporal_Sup_L | Angular_L | -3.5114 | 0.0004 |
| Temporal_Sup_L | Angular_L | -3.2154 | 0.0013 |
| Temporal_Sup_L | Precuneus_L | -3.4037 | 0.0007 |
| Temporal_Sup_L | Cingulum_Mid_R | -3.2154 | 0.0013 |
| Temporal_Sup_L | Precuneus_R | -3.3230 | 0.0009 |
| Temporal_Sup_L | Frontal_Med_Orb_L | -3.2154 | 0.0013 |
| Temporal_Sup_L | Frontal_Sup_Medial_L | -3.3499 | 0.0008 |
| Temporal_Sup_L | Temporal_Mid_R | -3.6459 | 0.0003 |
| Temporal_Sup_L | Temporal_Mid_L | -4.2109 | 0.0000 |
| Temporal_Sup_L | Temporal_Mid_L | -3.6728 | 0.0002 |
| Temporal_Sup_L | Temporal_Mid_L | -3.4306 | 0.0006 |
| Temporal_Sup_L | Temporal_Mid_R | -3.6459 | 0.0003 |
| Temporal_Sup_L | ParaHippocampal_L | -3.7266 | 0.0002 |
| Temporal_Sup_L | Fusiform_R | -3.6728 | 0.0002 |
| Temporal_Sup_L | Temporal_Mid_L | -3.2961 | 0.0010 |
| Temporal_Sup_R | Temporal_Mid_L | -3.6190 | 0.0003 |
| Temporal_Sup_R | Temporal_Mid_L | -3.8880 | 0.0001 |
| Temporal_Sup_R | Temporal_Mid_L | -3.4844 | 0.0005 |
| Temporal_Sup_R | Temporal_Mid_R | -3.8880 | 0.0001 |
| Temporal_Sup_R | Fusiform_R | -3.6459 | 0.0003 |
| Temporal_Mid_R | Precuneus_R | -3.2961 | 0.0010 |
| Temporal_Mid_R | Temporal_Mid_R | -3.2692 | 0.0011 |
| Temporal_Sup_R | Occipital_Mid_L | -3.4306 | 0.0006 |
| Temporal_Sup_R | Temporal_Mid_L | -4.3186 | 0.0000 |
| Temporal_Sup_R | Precuneus_L | -3.4306 | 0.0006 |
| Temporal_Sup_R | Precuneus_R | -3.4037 | 0.0007 |
| Temporal_Sup_R | Temporal_Mid_L | -3.6997 | 0.0002 |
| Temporal_Sup_R | Temporal_Mid_L | -3.8073 | 0.0001 |
| Temporal_Sup_R | Temporal_Mid_R | -3.2692 | 0.0011 |
| Temporal_Sup_R | ParaHippocampal_L | -3.3499 | 0.0008 |
| Temporal_Sup_R | Fusiform_R | -3.6728 | 0.0002 |
| Temporal_Sup_R | Temporal_Mid_L | -3.2423 | 0.0012 |
| AUD | Temporal_Mid_L | Temporal_Sup_R | -3.7535 | 0.0002 |
| Temporal_Mid_L | Rolandic_Oper_L | -3.5383 | 0.0004 |
| Temporal_Mid_L | Temporal_Sup_L | -3.6728 | 0.0002 |
| Temporal_Mid_L | Temporal_Sup_L | -3.9688 | 0.0001 |
| Temporal_Mid_L | Rolandic_Oper_R | -3.7804 | 0.0002 |
| Temporal_Sup_L | Temporal_Sup_L | -3.2423 | 0.0012 |
| Temporal_Sup_R | Temporal_Sup_R | -3.5652 | 0.0004 |
| Temporal_Sup_R | Temporal_Sup_L | -3.9957 | 0.0001 |
| Temporal_Sup_R | Rolandic_Oper_R | -3.3499 | 0.0008 |
| Temporal_Sup_R | Postcentral_R | -3.5383 | 0.0004 |
| Temporal_Mid_R | undefined | -3.5652 | 0.0004 |
| Temporal_Mid_R | Temporal_Sup_R | -4.0495 | 0.0001 |
| Temporal_Mid_R | Rolandic_Oper_L | -3.2692 | 0.0011 |
| Temporal_Mid_R | Temporal_Sup_L | -3.1616 | 0.0016 |
| Temporal_Mid_R | Rolandic_Oper_R | -3.2692 | 0.0011 |
| Temporal_Mid_R | SupraMarginal_L | -3.3499 | 0.0008 |
| Temporal_Mid_R | Rolandic_Oper_L | -3.6459 | 0.0003 |
| Temporal_Mid_R | undefined | -3.6190 | 0.0003 |
| Frontal_Inf_Tri_L | Rolandic_Oper_L | -3.1885 | 0.0014 |
| CON | Temporal_Sup_R | Frontal_Sup_R | -3.4844 | 0.0005 |
| Temporal_Sup_R | Temporal_Pole_Sup_L | -3.6190 | 0.0003 |
| Temporal_Mid_R | Supp_Motor_Area_R | -3.2154 | 0.0013 |
| DAN | SMN | Temporal_Mid_R | Precuneus_L | -3.3499 | 0.0008 |
| Temporal_Mid_R | Paracentral_Lobule_R | -3.1616 | 0.0016 |
| Occipital_Mid_L | Precuneus_L | -3.2961 | 0.0010 |
| Precentral_L | undefined | -3.4575 | 0.0005 |
| Precentral_L | Precentral_R | -3.2692 | 0.0011 |
| Precentral_L | Supp_Motor_Area_R | -3.1885 | 0.0014 |
| Precentral_L | Insula_R | -3.8342 | 0.0001 |
| Precentral_R | Supp_Motor_Area_L | -3.4037 | 0.0007 |
| DAN | Temporal_Mid_R | Temporal_Mid_L | -3.5114 | 0.0004 |
| Precentral_R | Precentral_L | -3.2423 | 0.0012 |
| VAN | Temporal_Mid_L | Temporal_Mid_L | -3.4306 | 0.0006 |
| Temporal_Mid_L | Temporal_Sup_R | -3.2692 | 0.0011 |
| Parietal_Sup_R | Temporal_Sup_R | -3.1616 | 0.0016 |
| Parietal_Sup_R | Temporal_Sup_R | -3.5652 | 0.0004 |
| Temporal_Mid_R | Temporal_Mid_L | -3.3230 | 0.0009 |
| Temporal_Mid_R | Temporal_Sup_R | -3.3499 | 0.0008 |
| Temporal_Mid_R | Frontal_Inf_Tri_L | -3.5114 | 0.0004 |
| Parietal_Sup_R | Temporal_Mid_R | -3.2154 | 0.0013 |
| Occipital_Mid_L | Temporal_Sup_R | -3.6190 | 0.0003 |
| Occipital_Mid_L | Temporal_Sup_R | -3.3499 | 0.0008 |
| Precentral_L | Temporal_Sup_R | -3.6997 | 0.0002 |
| Temporal_Inf_L | Temporal_Sup_L | -3.2692 | 0.0011 |
| Precentral_R | Temporal_Sup_R | -3.7535 | 0.0002 |
| Precentral_R | Temporal_Mid_R | -3.4306 | 0.0006 |
| SAN | Parietal_Sup_R | Parietal_Inf_R | -3.1616 | 0.0016 |
| Occipital_Mid_L | Frontal_Mid_L | -3.2692 | 0.0011 |
| FPN | Temporal_Mid_L | Precentral_L | -3.1616 | 0.0016 |
| Precentral_L | Precentral_L | -3.2423 | 0.0012 |
| Precentral_R | Precentral_L | -3.4844 | 0.0005 |
| VIN | Temporal_Mid_L | Occipital_Sup_R | -3.3768 | 0.0007 |
| Temporal_Mid_L | Cuneus_L | -3.2154 | 0.0013 |
| Temporal_Mid_R | Lingual_L | -3.1885 | 0.0014 |
| Temporal_Inf_L | Calcarine_R | -3.3230 | 0.0009 |
| Temporal_Inf_L | Lingual_L | -3.1885 | 0.0014 |
| Precentral_R | Lingual_L | -3.1616 | 0.0016 |
| DMN | Precuneus_R | Temporal_Mid_L | -3.2154 | 0.0013 |
| Temporal_Mid_L | Occipital_Mid_L | -3.7266 | 0.0002 |
| Temporal_Mid_L | Temporal_Mid_L | -4.2378 | 0.0000 |
| Temporal_Mid_L | Occipital_Mid_R | -3.5921 | 0.0003 |
| Temporal_Mid_L | Precuneus_L | -3.3768 | 0.0007 |
| Temporal_Mid_L | Cingulum_Mid_R | -3.3499 | 0.0008 |
| Temporal_Mid_L | Precuneus_R | -3.2423 | 0.0012 |
| Temporal_Mid_L | Frontal_Sup_L | -3.4844 | 0.0005 |
| Temporal_Mid_L | Temporal_Mid_L | -3.3499 | 0.0008 |
| Temporal_Mid_L | Temporal_Mid_R | -3.8073 | 0.0001 |
| Temporal_Mid_L | Fusiform_R | -3.4037 | 0.0007 |
| Temporal_Mid_L | Temporal_Mid_L | -3.6190 | 0.0003 |
| Parietal_Sup_R | Occipital_Mid_R | -3.9957 | 0.0001 |
| Temporal_Mid_R | Occipital_Mid_L | -3.3230 | 0.0009 |
| Temporal_Mid_R | Temporal_Mid_L | -3.3499 | 0.0008 |
| Temporal_Mid_R | Occipital_Mid_R | -3.2154 | 0.0013 |
| Temporal_Mid_R | Temporal_Mid_L | -3.4575 | 0.0005 |
| Temporal_Mid_R | Temporal_Mid_L | -3.4037 | 0.0007 |
| Temporal_Mid_R | Temporal_Mid_R | -3.4306 | 0.0006 |
| Temporal_Mid_R | ParaHippocampal_L | -3.5652 | 0.0004 |
| Temporal_Mid_R | Fusiform_L | -3.2423 | 0.0012 |
| Parietal_Sup_R | Occipital_Mid_R | -3.2961 | 0.0010 |
| Parietal_Inf_L | Occipital_Mid_R | -3.1616 | 0.0016 |
| Parietal_Inf_L | ParaHippocampal_L | -3.3499 | 0.0008 |
| Occipital_Mid_L | Occipital_Mid_L | -3.8073 | 0.0001 |
| Occipital_Mid_L | Occipital_Mid_R | -3.8611 | 0.0001 |
| Occipital_Mid_L | Angular_L | -3.1885 | 0.0014 |
| Occipital_Mid_L | Temporal_Mid_L | -3.4844 | 0.0005 |
| Parietal_Sup_L | Occipital_Mid_L | -3.1885 | 0.0014 |
| Parietal_Sup_L | Temporal_Mid_L | -3.3230 | 0.0009 |
| Parietal_Sup_L | Occipital_Mid_R | -3.3499 | 0.0008 |
| Precentral_R | Temporal_Pole_Mid_R | -3.4037 | 0.0007 |
| Precentral_R | Precuneus_L | -3.2961 | 0.0010 |
| Precentral_R | Temporal_Mid_L | -3.3230 | 0.0009 |
| AUD | Temporal_Mid_R | Postcentral_R | -3.6459 | 0.0003 |
| Precentral_L | Temporal_Sup_R | -3.6459 | 0.0003 |
| Precentral_L | SupraMarginal_L | -3.2961 | 0.0010 |
| Precentral_L | Rolandic_Oper_R | -3.3768 | 0.0007 |
| Temporal_Inf_L | Temporal_Sup_L | -3.3499 | 0.0008 |
| CON | Occipital_Mid_L | Temporal_Pole_Sup_L | -3.4306 | 0.0006 |
| Temporal_Inf_L | Temporal_Pole_Sup_L | -3.4306 | 0.0006 |

**Supplementary file XX. Modularity contribution and proportion of edge within and across subnetworks comparing between high and low encoding states.**

| **Subnetwork** | **Modularity**  **contribution** | | **Difference in proportion of edge (high vs low states)** | | | | | | | |
| --- | --- | --- | --- | --- | --- | --- | --- | --- | --- | --- |
| **Type of edge** | | | | **Within vs. Across** | | **ANOVA** | |
| **Within** | | **Across** | | **state-by-type of edges** | |
| *z* | *P* | *z* | *P* | *z* | *P* | *z* | *P* | *F* | *P* |
| SMN | -1.1705 | 0.2418 | -2.4082 | 0.0160 | -1.9508 | 0.0511 | -2.4351 | 0.0149 | 7.0226 | 0.0140 |
| CON | 1.6548 | 0.0980 | 1.5741 | 0.1155 | 0.6592 | 0.5098 | 1.6279 | 0.1036 | 2.6322 | 0.1178 |
| AUD | 0.8745 | 0.3819 | -2.1660 | 0.0303 | -2.3005 | 0.0214 | -1.8162 | 0.0693 | 3.7676 | 0.0641 |
| DMN | 2.0584 | 0.0396 | 1.8431 | 0.0653 | -0.0673 | 0.9464 | 1.8969 | 0.0578 | 3.9919 | 0.0572 |
| VIN | 0.2825 | 0.7775 | -0.2287 | 0.8191 | 0.2556 | 0.7982 | -0.2287 | 0.8191 | 0.0460 | 0.8320 |
| FPN | 1.3050 | 0.1919 | 1.5202 | 0.1285 | 1.2243 | 0.2209 | 1.3588 | 0.1742 | 2.1608 | 0.1546 |
| SAN | -0.8207 | 0.4118 | 0.9552 | 0.3395 | 1.9777 | 0.0480 | 0.4440 | 0.6571 | 0.1098 | 0.7432 |
| SUB | 2.7311 | 0.0063 | 3.0003 | 0.0027 | 2.7580 | 0.0058 | 2.5965 | 0.0094 | 8.4671 | 0.0077 |
| VAN | 0.4440 | 0.6571 | -2.5965 | 0.0094 | -2.6234 | 0.0087 | -2.3005 | 0.0214 | 5.8716 | 0.0233 |
| DAN | 2.3274 | 0.0199 | 0.1480 | 0.8823 | -1.4933 | 0.1353 | 0.9014 | 0.3674 | 0.3392 | 0.5657 |

**Supplementary file 1F. Modularity contribution and proportion of edges within and across subnetworks comparing between high and low encoding states.**

| **Subnetwork** | **Modularity**  **contribution** | | **Difference in proportion of edges (high vs low states)** | | | | | | | |
| --- | --- | --- | --- | --- | --- | --- | --- | --- | --- | --- |
| **Type of edge** | | | | **Within vs. Across** | | **ANOVA** | |
| **Within** | | **Across** | | **state-by-type of edges** | |
| *z* | *P* | *z* | *P* | *z* | *P* | *z* | *P* | *F* | *P* |
| SMN | -1.1705 | 0.2418 | -2.4082 | 0.0160 | -1.9508 | 0.0511 | -2.4351 | 0.0149 | 7.0226 | 0.0140 |
| CON | 1.6548 | 0.0980 | 1.5741 | 0.1155 | 0.6592 | 0.5098 | 1.6279 | 0.1036 | 2.6322 | 0.1178 |
| AUD | 0.8745 | 0.3819 | -2.1660 | 0.0303 | -2.3005 | 0.0214 | -1.8162 | 0.0693 | 3.7676 | 0.0641 |
| DMN | 2.0584 | 0.0396 | 1.8431 | 0.0653 | -0.0673 | 0.9464 | 1.8969 | 0.0578 | 3.9919 | 0.0572 |
| VIN | 0.2825 | 0.7775 | -0.2287 | 0.8191 | 0.2556 | 0.7982 | -0.2287 | 0.8191 | 0.0460 | 0.8320 |
| FPN | 1.3050 | 0.1919 | 1.5202 | 0.1285 | 1.2243 | 0.2209 | 1.3588 | 0.1742 | 2.1608 | 0.1546 |
| SAN | -0.8207 | 0.4118 | 0.9552 | 0.3395 | 1.9777 | 0.0480 | 0.4440 | 0.6571 | 0.1098 | 0.7432 |
| SUB | 2.7311 | 0.0063 | 3.0003 | 0.0027 | 2.7580 | 0.0058 | 2.5965 | 0.0094 | 8.4671 | 0.0077 |
| VAN | 0.4440 | 0.6571 | -2.5965 | 0.0094 | -2.6234 | 0.0087 | -2.3005 | 0.0214 | 5.8716 | 0.0233 |
| DAN | 2.3274 | 0.0199 | 0.1480 | 0.8823 | -1.4933 | 0.1353 | 0.9014 | 0.3674 | 0.3392 | 0.5657 |

**Supplementary file 1G. Five submodules of the DMN**

| **ROI ID** | **Coordinate** | | | **ROI name** | **Submodule ID** |
| --- | --- | --- | --- | --- | --- |
| **x** | **y** | **z** |
| 1 | -41 | -75 | 26 | Occipital_Mid_L | 1 |
| 2 | -13 | -40 | 1 | Precuneus_L | 1 |
| 3 | -46 | -61 | 21 | Temporal_Mid_L | 1 |
| 4 | 43 | -72 | 28 | Occipital_Mid_R | 1 |
| 5 | -7 | -55 | 27 | Precuneus_L | 1 |
| 6 | 6 | -59 | 35 | Precuneus_R | 1 |
| 7 | -11 | -56 | 16 | Precuneus_L | 1 |
| 8 | -3 | -49 | 13 | Precuneus_L | 1 |
| 9 | 8 | -48 | 31 | Cingulum_Mid_R | 1 |
| 10 | 15 | -63 | 26 | Precuneus_R | 1 |
| 11 | -2 | -37 | 44 | Cingulum_Mid_L | 1 |
| 12 | 11 | -54 | 17 | Precuneus_R | 1 |
| 13 | -26 | -40 | -8 | ParaHippocampal_L | 1 |
| 14 | 27 | -37 | -13 | Fusiform_R | 1 |
| 15 | -34 | -38 | -16 | Fusiform_L | 1 |
| 16 | -68 | -23 | -16 | Temporal_Mid_L | 2 |
| 17 | -44 | -65 | 35 | Angular_L | 2 |
| 18 | -39 | -75 | 44 | Angular_L | 2 |
| 19 | -10 | 39 | 52 | Frontal_Sup_Medial_L | 2 |
| 20 | -16 | 29 | 53 | Frontal_Sup_L | 2 |
| 21 | -35 | 20 | 51 | Frontal_Mid_L | 2 |
| 22 | 13 | 55 | 38 | Frontal_Sup_R | 2 |
| 23 | -10 | 55 | 39 | Frontal_Sup_L | 2 |
| 24 | -20 | 45 | 39 | Frontal_Sup_L | 2 |
| 25 | -2 | 38 | 36 | Frontal_Sup_Medial_L | 2 |
| 26 | -20 | 64 | 19 | Frontal_Sup_L | 2 |
| 27 | -58 | -30 | -4 | Temporal_Mid_L | 2 |
| 28 | -68 | -41 | -5 | Temporal_Mid_L | 2 |
| 29 | 13 | 30 | 59 | Frontal_Sup_Medial_R | 2 |
| 30 | 28 | -77 | -32 | Cerebelum_Crus1_R | 2 |
| 31 | -46 | 31 | -13 | Frontal_Inf_Orb_L | 2 |
| 32 | 49 | 35 | -12 | Frontal_Inf_Orb_R | 2 |
| 33 | 8 | 48 | -15 | Rectus_R | 3 |
| 34 | 6 | 54 | 16 | Frontal_Sup_Medial_R | 3 |
| 35 | 6 | 64 | 22 | Frontal_Sup_Medial_R | 3 |
| 36 | -7 | 51 | -1 | Cingulum_Ant_L | 3 |
| 37 | 9 | 54 | 3 | Frontal_Sup_Medial_R | 3 |
| 38 | -3 | 44 | -9 | Frontal_Med_Orb_L | 3 |
| 39 | 8 | 42 | -5 | Frontal_Med_Orb_R | 3 |
| 40 | -11 | 45 | 8 | Cingulum_Ant_L | 3 |
| 41 | -3 | 42 | 16 | Cingulum_Ant_L | 3 |
| 42 | -8 | 48 | 23 | Frontal_Sup_Medial_L | 3 |
| 43 | 12 | 36 | 20 | Cingulum_Ant_R | 3 |
| 44 | -44 | 12 | -34 | Temporal_Pole_Mid_L | 4 |
| 45 | 46 | 16 | -30 | Temporal_Pole_Mid_R | 4 |
| 46 | -56 | -13 | -10 | Temporal_Mid_L | 4 |
| 47 | 52 | -2 | -16 | Temporal_Mid_R | 4 |
| 48 | 52 | 7 | -30 | Temporal_Pole_Mid_R | 4 |
| 49 | -53 | 3 | -27 | Temporal_Mid_L | 4 |
| 50 | -49 | -42 | 1 | Temporal_Mid_L | 4 |
| 51 | 52 | -59 | 36 | Angular_R | 5 |
| 52 | 23 | 33 | 48 | Frontal_Sup_R | 5 |
| 53 | 22 | 39 | 39 | Frontal_Sup_R | 5 |
| 54 | 65 | -12 | -19 | Temporal_Mid_R | 5 |
| 55 | 65 | -31 | -9 | Temporal_Mid_R | 5 |
| 56 | 47 | -50 | 29 | Angular_R | 5 |

**Supplementary file 1H. Robustness of** **graph-analysis results in different window sizes and proportional thresholds.** We confirmed that the results of graph analysis comparing the high and low encoding states were robust across a range of window sizes (i.e., duration of time window; 7.2 s, 14.4 s, 21.6 s, 30 s, 36 s, 45 s, and 60 s) and proportional thresholds (0.1, 0.15, 0.2, and 0.25).

| **Duration of time window** | **Threshold** | ***Eg*** | | ***Eloc*** | | **PC** | | **Modularity** | |
| --- | --- | --- | --- | --- | --- | --- | --- | --- | --- |
| *z* | *P* | *z* | *P* | *z* | *P* | *z* | *P* |
| 10TR (7.2 s) | 0.10 | 3.0270 | 0.0025 | 0.0404 | 0.9678 | 1.8969 | 0.0578 | 1.2512 | 0.2109 |
| 0.15 | 2.9732 | 0.0029 | -0.6861 | 0.4926 | 1.0897 | 0.2758 | 0.9552 | 0.3395 |
| 0.20 | 3.0808 | 0.0021 | -1.7355 | 0.0827 | 0.8207 | 0.4118 | 1.1705 | 0.2418 |
| 0.25 | 3.2154 | 0.0013 | -2.5158 | 0.0119 | 0.8745 | 0.3819 | 1.0090 | 0.3130 |
| 20TR (14.4 s) | 0.10 | 3.2961 | 0.0010 | 1.7624 | 0.0780 | 2.0853 | 0.0370 | 3.1347 | 0.0017 |
| 0.15 | 3.3768 | 0.0007 | 0.1480 | 0.8824 | 1.4933 | 0.1353 | 2.6772 | 0.0074 |
| 0.20 | 3.5383 | 0.0004 | -1.6010 | 0.1094 | 1.6010 | 0.1094 | 2.6772 | 0.0074 |
| 0.25 | 3.5652 | 0.0004 | -3.0808 | 0.0021 | 0.1211 | 0.9036 | 2.5158 | 0.0119 |
| 30TR (21.6 s) | 0.10 | 3.4037 | 0.0007 | 0.6054 | 0.5449 | 2.3813 | 0.0173 | 2.7580 | 0.0058 |
| 0.15 | 3.4306 | 0.0006 | -0.5516 | 0.5812 | 2.4082 | 0.0160 | 2.2467 | 0.0247 |
| 0.20 | 3.4844 | 0.0005 | -2.3813 | 0.0173 | 3.0539 | 0.0023 | 2.0584 | 0.0396 |
| 0.25 | 3.4306 | 0.0006 | -3.0270 | 0.0025 | 1.7624 | 0.0780 | 1.9508 | 0.0511 |
| 41TR (30 s) | 0.10 | 4.1571 | 0.0001 | 0.1480 | 0.8824 | 3.0808 | 0.0021 | 2.5427 | 0.0110 |
| 0.15 | 4.2917 | 0.0001 | -1.3588 | 0.1742 | 2.8118 | 0.0049 | 2.3005 | 0.0214 |
| 0.20 | 4.2917 | 0.0001 | -2.8118 | 0.0049 | 1.6817 | 0.0926 | 2.1122 | 0.0347 |
| 0.25 | 4.2647 | 0.0001 | -4.0495 | 0.0001 | 2.1660 | 0.0303 | 1.8700 | 0.0615 |
| 50TR (36 s) | 0.10 | 3.7266 | 0.0002 | 1.4933 | 0.1353 | 2.8387 | 0.0045 | 3.1077 | 0.0019 |
| 0.15 | 3.9688 | 0.0001 | -0.6861 | 0.4926 | 2.7580 | 0.0058 | 2.5427 | 0.0110 |
| 0.20 | 3.9688 | 0.0001 | -2.4620 | 0.0138 | 2.7041 | 0.0068 | 2.3274 | 0.0199 |
| 0.25 | 4.1840 | 0.0001 | -3.8073 | 0.0001 | 2.1391 | 0.0324 | 2.0584 | 0.0396 |
| 62TR (45 s) | 0.10 | 4.2109 | 0.0001 | 1.7086 | 0.0875 | 1.9508 | 0.0511 | 3.2423 | 0.0012 |
| 0.15 | 4.2378 | 0.0001 | -0.1211 | 0.9036 | 1.7086 | 0.0875 | 3.0539 | 0.0023 |
| 0.20 | 4.2647 | 0.0001 | -2.8387 | 0.0045 | 1.9777 | 0.0480 | 2.8387 | 0.0045 |
| 0.25 | 4.2647 | 0.0001 | -4.0226 | 0.0001 | 1.8162 | 0.0693 | 2.3274 | 0.0199 |
| 83TR (60 s) | 0.10 | 3.1347 | 0.0017 | 0.1749 | 0.8612 | 1.4126 | 0.1578 | 3.2692 | 0.0011 |
| 0.15 | 3.6190 | 0.0003 | -1.1974 | 0.2312 | 1.1435 | 0.2528 | 2.7849 | 0.0054 |
| 0.20 | 3.7266 | 0.0002 | -2.1660 | 0.0303 | 1.4933 | 0.1353 | 2.6234 | 0.0087 |
| 0.25 | 3.5921 | 0.0003 | -3.4306 | 0.0006 | 1.4395 | 0.1500 | 2.1929 | 0.0283 |

*Notes*. Statistics are derived from Wilcoxon signed-rank tests. Graph metrics (*Eg*: global efficiency; *Eloc*: local efficiency; PC: participation coefficient; Modularity) were computed at the entire-network level.

**Supplementary file 1I.** **Results of graph analysis using overlapping sliding windows.** We confirmed that the results of graph analysis comparing the high and low encoding states were unchanged when we used sliding windows (in steps of 1 TR, resulting in 2,100 windows per participant).

| **Duration of time window** | **Threshold** | ***Eg*** | | ***Eloc*** | | **PC** | | **Modularity** | |
| --- | --- | --- | --- | --- | --- | --- | --- | --- | --- |
| *z* | *P* | *z* | *P* | *z* | *P* | *z* | *P* |
| 36 s | 0.10 | 3.7266 | 0.0002 | 1.4933 | 0.1353 | 2.1391 | 0.0324 | 3.1885 | 0.0014 |
| 0.15 | 3.9688 | 0.0001 | -0.6861 | 0.4926 | 2.2467 | 0.0247 | 2.4620 | 0.0138 |
| 0.20 | 3.9688 | 0.0001 | -2.4620 | 0.0138 | 3.4037 | 0.0007 | 2.4351 | 0.0149 |
| 0.25 | 4.1840 | 0.0001 | -3.8073 | 0.0001 | 2.6234 | 0.0087 | 1.8700 | 0.0615 |

*Notes*. Statistics are derived from Wilcoxon signed-rank tests. Graph metrics (*Eg*: global efficiency; *Eloc*: local efficiency; PC: participation coefficient; Modularity) were computed at the entire-network level.

**Supplementary file 1J. Results of graph analysis using time series shifted by 5 s.** We confirmed that the results of graph analysis comparing the high and low encoding states were unchanged when we shifted time series (before dividing it into short time windows) by 5 s to take the hemodynamic delay of BOLD response into account (5s, according to canonical hemodynamic response function provided by SPM12).

| **Duration of time window** | **Threshold** | ***Eg*** | | ***Eloc*** | | **PC** | | **Modularity** | |
| --- | --- | --- | --- | --- | --- | --- | --- | --- | --- |
| *z* | *P* | *z* | *P* | *z* | *P* | *z* | *P* |
| 36 s | 0.10 | 3.7266 | 0.0002 | 1.4933 | 0.1353 | 2.5427 | 0.0110 | 3.0270 | 0.0025 |
| 0.15 | 3.9688 | 0.0001 | -0.6861 | 0.4926 | 2.3544 | 0.0186 | 2.6503 | 0.0080 |
| 0.20 | 3.9688 | 0.0001 | -2.4620 | 0.0138 | 2.2467 | 0.0247 | 2.3274 | 0.0199 |
| 0.25 | 4.1840 | 0.0001 | -3.8073 | 0.0001 | 2.7041 | 0.0068 | 1.7893 | 0.0736 |

*Notes*. Statistics are derived from Wilcoxon signed-rank tests. Graph metrics (*Eg*: global efficiency; *Eloc*: local efficiency; PC: participation coefficient; Modularity) were computed at the entire-network level.

**Supplementary file 1K. Results of graph analysis using time series that contain task-related signals.** We confirmed that the results of graph analysis comparing the high and low encoding states were unchanged when we used time series that kept task-related signals instead of residual time series.

| **Duration of time window** | **Threshold** | ***Eg*** | | ***Eloc*** | | **PC** | | **Modularity** | |
| --- | --- | --- | --- | --- | --- | --- | --- | --- | --- |
| *z* | *P* | *z* | *P* | *z* | *P* | *z* | *P* |
| 36 s | 0.10 | 3.6728 | 0.0002 | 1.5471 | 0.1218 | 1.4395 | 0.1500 | 3.0539 | 0.0023 |
| 0.15 | 3.9957 | 0.0001 | -0.6861 | 0.4926 | 2.6772 | 0.0074 | 2.5696 | 0.0102 |
| 0.20 | 3.9688 | 0.0001 | -2.4889 | 0.0128 | 2.2736 | 0.0230 | 2.3813 | 0.0173 |
| 0.25 | 4.1571 | 0.0001 | -3.8073 | 0.0001 | 2.0853 | 0.0370 | 1.8431 | 0.0653 |

*Notes*. Statistics are derived from Wilcoxon signed-rank tests. Graph metrics (*Eg*: global efficiency; *Eloc*: local efficiency; PC: participation coefficient; Modularity) were computed at the entire-network level.

**Supplementary file 1L. Results of graph analysis including low-confidence hit trials.** We confirmed that the results of graph analysis comparing the high and low encoding states were unchanged when we defined the window-wise encoding performance by using both high- and low-confidence hit trials (i.e., the number of HH plus LH trials divided by that of the picture trials, computed within each time window).

| **Duration of time window** | **Threshold** | ***Eg*** | | ***Eloc*** | | **PC** | | **Modularity** | |
| --- | --- | --- | --- | --- | --- | --- | --- | --- | --- |
| *z* | *P* | *z* | *P* | *z* | *P* | *z* | *P* |
| 36 s | 0.10 | 3.1077 | 0.0019 | 2.1660 | 0.0303 | 0.7938 | 0.4273 | 2.7311 | 0.0063 |
| 0.15 | 3.0270 | 0.0025 | 0.9014 | 0.3674 | 1.1166 | 0.2641 | 2.0853 | 0.0370 |
| 0.20 | 3.0539 | 0.0023 | -0.7668 | 0.4432 | 0.2556 | 0.7982 | 1.6817 | 0.0926 |
| 0.25 | 3.1347 | 0.0017 | -2.2736 | 0.0230 | 0.9821 | 0.3260 | 1.0628 | 0.2879 |

*Notes*. Statistics are derived from Wilcoxon signed-rank tests. Graph metrics (*Eg*: global efficiency; *Eloc*: local efficiency; PC: participation coefficient; Modularity) were computed at the entire-network level.

**Supplementary file 1M. Graph-analysis results using tertiles to classify high and low encoding states.** In this control analysis, we classified the time windows based on participant-specific tertiles of window-wise encoding performance, and compared graph metrics between the top and bottom tertiles. The proportion of HH trials was 69.7% ± 16.3% (5.58 ± 1.33 trials per window) for the top tertile and 28.4 ± 14.4% (2.24 ± 1.13 trials per window) for the bottom tertile.

| **Duration of time window** | **Threshold** | ***Eg*** | | ***Eloc*** | | **PC** | | **Modularity** | |
| --- | --- | --- | --- | --- | --- | --- | --- | --- | --- |
| *z* | *P* | *z* | *P* | *z* | *P* | *z* | *P* |
| 41TR (30 s) | 0.10 | 4.2647 | 0.0001 | 0.8207 | 0.4118 | 2.3274 | 0.0199 | 2.3005 | 0.0214 |
| 0.15 | 4.2647 | 0.0001 | -1.2243 | 0.2209 | 2.1929 | 0.0283 | 2.2467 | 0.0247 |
| 0.20 | 4.2647 | 0.0001 | -3.5383 | 0.0004 | 2.6772 | 0.0074 | 1.8969 | 0.0578 |
| 0.25 | 4.2647 | 0.0001 | -4.0764 | 0.0000 | 2.3813 | 0.0173 | 1.6279 | 0.1036 |
| 50TR (36 s) | 0.10 | 3.7804 | 0.0002 | 1.6817 | 0.0926 | 2.6234 | 0.0087 | 3.6997 | 0.0002 |
| 0.15 | 3.8611 | 0.0001 | -0.9821 | 0.3260 | 2.9732 | 0.0029 | 3.0808 | 0.0021 |
| 0.20 | 3.8342 | 0.0001 | -2.8656 | 0.0042 | 2.7041 | 0.0068 | 2.9194 | 0.0035 |
| 0.25 | 3.9419 | 0.0001 | -3.4575 | 0.0005 | 3.4306 | 0.0006 | 2.1929 | 0.0283 |
| 62TR (45 s) | 0.10 | 3.6997 | 0.0002 | 1.1974 | 0.2312 | 2.1929 | 0.0283 | 3.0808 | 0.0021 |
| 0.15 | 3.7804 | 0.0002 | -1.1166 | 0.2641 | 2.5696 | 0.0102 | 2.7311 | 0.0063 |
| 0.20 | 3.8611 | 0.0001 | -3.5652 | 0.0004 | 2.2467 | 0.0247 | 2.5427 | 0.0110 |
| 0.25 | 3.9688 | 0.0001 | -3.8880 | 0.0001 | 2.8656 | 0.0042 | 2.1929 | 0.0283 |
| 83TR (60 s) | 0.10 | 3.1077 | 0.0019 | 0.7668 | 0.4432 | 2.0853 | 0.0370 | 2.8925 | 0.0038 |
| 0.15 | 3.4037 | 0.0007 | -1.1705 | 0.2418 | 1.4126 | 0.1578 | 2.4620 | 0.0138 |
| 0.20 | 3.3230 | 0.0009 | -2.5696 | 0.0102 | 1.3319 | 0.1829 | 2.1660 | 0.0303 |
| 0.25 | 3.3499 | 0.0008 | -3.1885 | 0.0014 | 1.8431 | 0.0653 | 1.9238 | 0.0544 |

*Notes*. Statistics are derived from Wilcoxon signed-rank tests. Graph metrics (*Eg*: global efficiency; *Eloc*: local efficiency; PC: participation coefficient; Modularity) were computed at the entire-network level.

**Supplementary file 1N. Graph-analysis results using quartiles to classify high and low encoding states.** In this control analysis, we classified the time windows based on participant-specific quartiles of window-wise encoding performance, and compared graph metrics between the top and bottom quartiles. The proportion of HH trials was 73.2% ± 16.2% (5.91 ± 1.37 trials per window) for the top quartile and 24.7 ± 14.1% (1.94 ± 1.11 trials per window) for the bottom quartile.

| **Duration of time window** | **Threshold** | ***Eg*** | | ***Eloc*** | | **PC** | | **Modularity** | |
| --- | --- | --- | --- | --- | --- | --- | --- | --- | --- |
| *z* | *P* | *z* | *P* | *z* | *P* | *z* | *P* |
| 41TR (30 s) | 0.10 | 4.3186 | 0.0001 | -0.2287 | 0.8191 | 3.0539 | 0.0023 | 1.8700 | 0.0615 |
| 0.15 | 4.3186 | 0.0001 | -1.7624 | 0.0780 | 2.3274 | 0.0199 | 1.6279 | 0.1036 |
| 0.20 | 4.2917 | 0.0001 | -3.6997 | 0.0002 | 2.6234 | 0.0087 | 1.3588 | 0.1742 |
| 0.25 | 4.2917 | 0.0001 | -4.1571 | 0.0000 | 1.8700 | 0.0615 | 0.8476 | 0.3967 |
| 50TR (36 s) | 0.10 | 3.4306 | 0.0006 | 1.0090 | 0.3130 | 2.1122 | 0.0347 | 3.3768 | 0.0007 |
| 0.15 | 3.6190 | 0.0003 | -0.8745 | 0.3819 | 2.6234 | 0.0087 | 2.7580 | 0.0058 |
| 0.20 | 3.5114 | 0.0004 | -2.8387 | 0.0045 | 2.5158 | 0.0119 | 2.2198 | 0.0264 |
| 0.25 | 3.6190 | 0.0003 | -3.3230 | 0.0009 | 2.5158 | 0.0119 | 1.6817 | 0.0926 |
| 62TR (45 s) | 0.10 | 3.6997 | 0.0002 | 1.2781 | 0.2012 | 1.6279 | 0.1036 | 3.2154 | 0.0013 |
| 0.15 | 3.8073 | 0.0001 | -0.9552 | 0.3395 | 3.0270 | 0.0025 | 3.1347 | 0.0017 |
| 0.20 | 3.8880 | 0.0001 | -3.3768 | 0.0007 | 3.1077 | 0.0019 | 2.9194 | 0.0035 |
| 0.25 | 4.0226 | 0.0001 | -3.7266 | 0.0002 | 3.1347 | 0.0017 | 2.6234 | 0.0087 |
| 83TR (60 s) | 0.10 | 3.4844 | 0.0005 | 0.2825 | 0.7775 | 1.7355 | 0.0827 | 3.0808 | 0.0021 |
| 0.15 | 3.5383 | 0.0004 | -1.4395 | 0.1500 | 1.5471 | 0.1218 | 2.7041 | 0.0068 |
| 0.20 | 3.6190 | 0.0003 | -3.1347 | 0.0017 | 1.7086 | 0.0875 | 2.5696 | 0.0102 |
| 0.25 | 3.5652 | 0.0004 | -3.6997 | 0.0002 | 2.1122 | 0.0347 | 2.0315 | 0.0422 |

*Notes*. Statistics are derived from Wilcoxon signed-rank tests. Graph metrics (*Eg*: global efficiency; *Eloc*: local efficiency; PC: participation coefficient; Modularity) were computed at the entire-network level.**Supplementary file 1O. Results of graph analysis controlling for time passed within a session or across sessions.** We confirmed that the results of graph analysis comparing the high and low encoding states were unchanged when we regressed out the effect of the amount of time passed within sessions (defined by a dummy variable denoting the order of windows [1, 2, 3, … 15] in each session) or time passed across sessions (defined by a dummy variable denoting session ID [1, 1, … 2, 2, … 3, 3, …]) on a window-by-window basis.

| **Covariate** | ***Eg*** | | ***Eloc*** | | **PC** | | **Modularity** | |
| --- | --- | --- | --- | --- | --- | --- | --- | --- |
| *z* | *P* | *z* | *P* | *z* | *P* | *z* | *P* |
| Time passed within each session, linear | 3.4575 | 0.0005 | 0.3094 | 0.7570 | 2.0853 | 0.0370 | 3.4575 | 0.0005 |
| Time passed within each session, quadratic | 3.9150 | 0.0001 | -0.7130 | 0.4758 | 2.8387 | 0.0045 | 3.9150 | 0.0001 |
| Time passed across sessions, linear | 3.9957 | 0.0001 | -0.7938 | 0.4273 | 2.5427 | 0.0110 | 3.9957 | 0.0001 |
| Time passed across sessions, quadratic | 3.9957 | 0.0001 | -1.0359 | 0.3002 | 2.7041 | 0.0068 | 3.9957 | 0.0001 |

*Notes*. Statistics are derived from Wilcoxon signed-rank tests. Graph metrics (*Eg*: global efficiency; *Eloc*: local efficiency; PC: participation coefficient; Modularity) were computed at the entire-network level.

**Supplementary file 1P. Results of control analysis testing effect of proportion of picture trials.** In this control analysis, we classified the time windows based on the proportion of the picture trials and compared the graph metrics between “more pic” and “fewer pic” periods.

| **Duration of time window** | **Threshold** | ***Eg*** | | ***Eloc*** | | **PC** | | **Modularity** | |
| --- | --- | --- | --- | --- | --- | --- | --- | --- | --- |
| *z* | *P* | *z* | *P* | *z* | *P* | *z* | *P* |
| 36 s | 0.10 | 0.9552 | 0.3395 | 0.2825 | 0.7775 | -0.3902 | 0.6964 | 1.2781 | 0.2012 |
| 0.15 | 0.8207 | 0.4118 | 0.2287 | 0.8191 | -0.2825 | 0.7775 | 1.3319 | 0.1829 |
| 0.20 | 0.5785 | 0.5629 | -0.5516 | 0.5812 | 0.2287 | 0.8191 | 1.3050 | 0.1919 |
| 0.25 | 0.6592 | 0.5098 | -0.4709 | 0.6377 | -0.0673 | 0.9464 | 1.0090 | 0.3130 |

*Notes*. Statistics are derived from Wilcoxon signed-rank tests. Graph metrics (*Eg*: global efficiency; *Eloc*: local efficiency; PC: participation coefficient; Modularity) were computed at the entire-network level.

**Supplementary file 1Q. Results of control analysis testing effect of reaction time for semantic judgment.** In this control analysis, we classified the time windows based on mean RT (computed within each time window) for semantic judgment and compared the graph metrics between “longer RT” and “shorter RT” periods.

| **Duration of time window** | **Threshold** | ***Eg*** | | ***Eloc*** | | **PC** | | **Modularity** | |
| --- | --- | --- | --- | --- | --- | --- | --- | --- | --- |
| *z* | *P* | *z* | *P* | *z* | *P* | *z* | *P* |
| 36 s | 0.10 | -0.4978 | 0.6186 | 0.5247 | 0.5998 | -0.1749 | 0.8612 | -1.4395 | 0.1500 |
| 0.15 | -0.7130 | 0.4758 | 0.2556 | 0.7982 | -0.0404 | 0.9678 | -1.0090 | 0.3130 |
| 0.20 | -0.7399 | 0.4593 | 1.5741 | 0.1155 | -0.4440 | 0.6571 | -1.1166 | 0.2641 |
| 0.25 | -0.6323 | 0.5272 | 1.1166 | 0.2641 | -0.6861 | 0.4926 | -0.7130 | 0.4758 |

*Notes*. Statistics are derived from Wilcoxon signed-rank tests. Graph metrics (*Eg*: global efficiency; *Eloc*: local efficiency; PC: participation coefficient; Modularity) were computed at the entire-network level.

**Supplementary file 1R. 285 ROIs included in 11 subnetworks of the Gordon atlas.**

| **ROI ID** | **MNI coordinates** | | | **Assigned network** |
| --- | --- | --- | --- | --- |
| ***x*** | ***y*** | ***z*** |
| 1 | -18.80 | -48.70 | 65.00 | SMN |
| 2 | -10.70 | -47.50 | 60.30 | SMN |
| 3 | -15.60 | -33.10 | 66.10 | SMN |
| 4 | -10.90 | -29.30 | 69.50 | SMN |
| 5 | -6.60 | -20.40 | 74.20 | SMN |
| 6 | -10.80 | -41.10 | 64.90 | SMN |
| 7 | -5.00 | -28.20 | 60.40 | SMN |
| 8 | -5.40 | -15.90 | 48.80 | SMN |
| 9 | -35.80 | -29.70 | 54.50 | SMN |
| 10 | -36.80 | -22.80 | 61.90 | SMN |
| 11 | -20.50 | -24.90 | 64.50 | SMN |
| 12 | -23.40 | -13.80 | 64.20 | SMN |
| 13 | -17.20 | -8.60 | 67.90 | SMN |
| 14 | -28.60 | -44.70 | 61.70 | SMN |
| 15 | -54.10 | -21.30 | 40.80 | SMN |
| 16 | -35.20 | -35.30 | 42.00 | SMN |
| 17 | -27.50 | -37.20 | 61.40 | SMN |
| 18 | -47.20 | -31.40 | 54.80 | SMN |
| 19 | 20.80 | -48.20 | 66.10 | SMN |
| 20 | 16.50 | -32.80 | 67.70 | SMN |
| 21 | 4.80 | -27.10 | 64.80 | SMN |
| 22 | 11.90 | -40.70 | 67.00 | SMN |
| 23 | 5.10 | -17.10 | 51.60 | SMN |
| 24 | 6.80 | -8.10 | 50.90 | SMN |
| 25 | 38.10 | -22.40 | 60.30 | SMN |
| 26 | 19.70 | -25.00 | 65.20 | SMN |
| 27 | 12.40 | -28.30 | 69.60 | SMN |
| 28 | 29.20 | -13.50 | 64.20 | SMN |
| 29 | 17.00 | -16.90 | 70.90 | SMN |
| 30 | 20.90 | -6.40 | 65.00 | SMN |
| 31 | 29.50 | -42.50 | 60.40 | SMN |
| 32 | 34.20 | -40.60 | 51.60 | SMN |
| 33 | 39.60 | -31.50 | 39.70 | SMN |
| 34 | 28.00 | -34.80 | 63.10 | SMN |
| 35 | 39.20 | -34.60 | 57.50 | SMN |
| 36 | 37.30 | -25.90 | 50.90 | SMN |
| 37 | 48.70 | -26.10 | 52.20 | SMN |
| 38 | 53.00 | -22.70 | 39.10 | SMN |
| 39 | -51.80 | -7.80 | 38.50 | SMN |
| 40 | -41.50 | -12.50 | 50.40 | SMN |
| 41 | -51.50 | -11.90 | 29.70 | SMN |
| 42 | -46.10 | -17.80 | 52.70 | SMN |
| 43 | 49.60 | -7.40 | 36.10 | SMN |
| 44 | 42.30 | -11.00 | 47.30 | SMN |
| 45 | 53.90 | -8.30 | 26.10 | SMN |
| 46 | 47.80 | -15.10 | 49.30 | SMN |
| 47 | -16.60 | -36.10 | 42.70 | CON |
| 48 | -9.40 | -0.10 | 42.90 | CON |
| 49 | -8.40 | 14.60 | 33.80 | CON |
| 50 | -9.00 | 25.30 | 27.70 | CON |
| 51 | -8.00 | -8.70 | 62.90 | CON |
| 52 | -42.10 | -4.50 | 47.30 | CON |
| 53 | -57.70 | -40.60 | 35.80 | CON |
| 54 | -38.70 | -16.00 | -5.30 | CON |
| 55 | -39.10 | -1.60 | -12.20 | CON |
| 56 | -37.70 | 2.90 | 11.70 | CON |
| 57 | -36.60 | 1.40 | 6.40 | CON |
| 58 | -37.30 | 8.90 | -0.90 | CON |
| 59 | -28.80 | 23.70 | 8.40 | CON |
| 60 | -59.80 | -4.10 | 8.80 | CON |
| 61 | -55.10 | -32.30 | 23.00 | CON |
| 62 | -58.80 | -23.90 | 31.00 | CON |
| 63 | -51.80 | -0.60 | 5.00 | CON |
| 64 | -48.60 | 7.50 | 11.10 | CON |
| 65 | -26.60 | 46.80 | 20.90 | CON |
| 66 | -28.80 | 38.30 | 28.20 | CON |
| 67 | 16.20 | -33.10 | 43.20 | CON |
| 68 | 6.70 | 5.00 | 55.90 | CON |
| 69 | 8.60 | 4.20 | 40.10 | CON |
| 70 | 8.80 | 10.80 | 45.90 | CON |
| 71 | 6.00 | 21.80 | 32.40 | CON |
| 72 | 16.20 | 0.80 | 67.50 | CON |
| 73 | 8.00 | -6.20 | 63.70 | CON |
| 74 | 42.50 | -2.30 | 47.20 | CON |
| 75 | 57.50 | -40.30 | 34.70 | CON |
| 76 | 54.90 | -27.00 | 29.60 | CON |
| 77 | 38.80 | -14.40 | -5.00 | CON |
| 78 | 39.70 | 1.20 | -13.10 | CON |
| 79 | 36.70 | 5.20 | 12.70 | CON |
| 80 | 39.60 | 10.40 | -1.60 | CON |
| 81 | 36.50 | 5.70 | 6.00 | CON |
| 82 | 33.70 | 22.60 | 3.70 | CON |
| 83 | 34.00 | 24.40 | 10.00 | CON |
| 84 | 50.10 | 3.00 | 3.90 | CON |
| 85 | 24.40 | 50.80 | 24.30 | CON |
| 86 | 31.30 | 39.70 | 25.60 | CON |
| 87 | -6.10 | -26.00 | 28.50 | CON |
| 88 | -12.70 | -64.90 | 31.80 | CON |
| 89 | -10.90 | -73.40 | 42.90 | CON |
| 90 | 7.60 | -27.00 | 28.40 | CON |
| 91 | 15.60 | -69.50 | 39.60 | CON |
| 92 | -32.00 | -29.30 | 15.60 | AUD |
| 93 | -46.30 | -41.40 | 25.90 | AUD |
| 94 | -35.80 | -33.50 | 19.90 | AUD |
| 95 | -52.70 | -20.60 | 5.40 | AUD |
| 96 | -59.60 | -38.50 | 16.50 | AUD |
| 97 | -58.70 | -29.90 | 11.10 | AUD |
| 98 | -40.60 | -38.30 | 14.50 | AUD |
| 99 | -33.70 | -21.80 | 9.90 | AUD |
| 100 | -37.20 | -14.00 | 19.40 | AUD |
| 101 | -52.20 | -14.10 | 15.20 | AUD |
| 102 | -50.60 | -22.40 | 19.20 | AUD |
| 103 | -54.40 | -1.40 | -0.70 | AUD |
| 104 | 33.60 | -22.30 | 13.00 | AUD |
| 105 | 36.40 | -30.70 | 19.40 | AUD |
| 106 | 53.80 | -15.80 | 5.20 | AUD |
| 107 | 59.20 | -38.60 | 14.60 | AUD |
| 108 | 61.70 | -24.00 | 1.30 | AUD |
| 109 | 60.00 | -25.20 | 10.20 | AUD |
| 110 | 38.40 | -12.20 | 20.00 | AUD |
| 111 | 36.60 | -10.00 | 12.40 | AUD |
| 112 | 60.90 | -2.20 | 10.70 | AUD |
| 113 | 54.20 | -13.60 | 16.90 | AUD |
| 114 | 39.70 | -22.50 | 2.60 | AUD |
| 115 | 55.80 | 2.00 | -2.00 | AUD |
| 116 | -11.20 | -52.40 | 36.50 | DMN |
| 117 | -11.70 | 26.70 | 57.00 | DMN |
| 118 | -47.20 | -58.00 | 30.80 | DMN |
| 119 | -5.60 | 42.20 | 35.10 | DMN |
| 120 | -1.70 | -17.70 | 39.10 | DMN |
| 121 | -19.50 | 30.10 | 45.50 | DMN |
| 122 | -39.30 | -73.90 | 38.30 | DMN |
| 123 | -27.50 | 53.60 | 0.00 | DMN |
| 124 | -5.90 | 54.80 | -11.30 | DMN |
| 125 | -6.80 | 38.20 | -9.40 | DMN |
| 126 | -63.20 | -28.70 | -7.20 | DMN |
| 127 | -53.10 | -11.40 | -16.00 | DMN |
| 128 | -15.90 | 48.60 | 37.20 | DMN |
| 129 | -19.50 | 56.30 | 27.50 | DMN |
| 130 | -6.50 | 54.70 | 18.10 | DMN |
| 131 | -15.70 | 64.70 | 13.70 | DMN |
| 132 | -6.00 | 44.90 | 6.30 | DMN |
| 133 | -26.20 | 26.60 | 38.80 | DMN |
| 134 | -29.30 | 16.80 | 50.70 | DMN |
| 135 | -41.70 | 16.10 | 47.50 | DMN |
| 136 | 12.30 | -51.60 | 34.50 | DMN |
| 137 | 11.90 | 21.90 | 59.90 | DMN |
| 138 | 7.70 | 44.10 | 5.50 | DMN |
| 139 | 3.00 | -19.60 | 37.90 | DMN |
| 140 | 21.90 | 21.00 | 46.20 | DMN |
| 141 | 48.90 | -53.00 | 28.60 | DMN |
| 142 | 62.50 | -25.60 | -5.50 | DMN |
| 143 | 7.40 | -69.30 | 49.90 | DMN |
| 144 | 46.50 | -67.30 | 36.20 | DMN |
| 145 | 7.20 | 48.40 | -10.10 | DMN |
| 146 | 57.50 | -7.40 | -16.40 | DMN |
| 147 | 21.00 | 32.80 | 42.10 | DMN |
| 148 | 21.40 | 42.80 | 35.10 | DMN |
| 149 | 16.00 | 61.00 | 19.80 | DMN |
| 150 | 8.20 | 53.80 | 14.00 | DMN |
| 151 | 5.90 | 54.90 | 29.40 | DMN |
| 152 | 13.80 | 46.70 | 42.10 | DMN |
| 153 | 6.80 | 44.50 | 34.80 | DMN |
| 154 | 30.60 | 18.90 | 48.70 | DMN |
| 155 | 54.40 | 1.10 | -12.90 | DMN |
| 156 | -18.40 | -85.50 | 21.60 | VIN |
| 157 | -16.80 | -60.10 | -5.40 | VIN |
| 158 | -11.30 | -83.20 | 3.90 | VIN |
| 159 | -22.00 | -58.10 | 1.50 | VIN |
| 160 | -9.60 | -58.00 | 3.00 | VIN |
| 161 | -16.70 | -46.00 | -3.70 | VIN |
| 162 | -13.70 | -77.40 | 26.60 | VIN |
| 163 | -31.30 | -84.20 | 9.00 | VIN |
| 164 | -34.20 | -86.60 | -0.50 | VIN |
| 165 | -43.40 | -67.60 | 9.70 | VIN |
| 166 | -28.80 | -58.80 | -9.10 | VIN |
| 167 | -34.40 | -63.90 | -15.70 | VIN |
| 168 | -34.30 | -43.80 | -21.60 | VIN |
| 169 | -5.40 | -88.00 | 18.60 | VIN |
| 170 | -8.60 | -77.50 | -3.50 | VIN |
| 171 | -41.20 | -72.10 | -5.90 | VIN |
| 172 | -25.20 | -97.20 | -7.90 | VIN |
| 173 | -22.60 | -81.70 | -11.70 | VIN |
| 174 | 22.00 | -84.60 | 23.70 | VIN |
| 175 | 22.30 | -46.50 | -9.90 | VIN |
| 176 | 15.50 | -74.10 | 9.40 | VIN |
| 177 | 19.60 | -45.30 | -4.40 | VIN |
| 178 | 15.60 | -59.60 | -5.00 | VIN |
| 179 | 26.80 | -55.00 | 54.20 | VIN |
| 180 | 17.60 | -78.30 | 34.00 | VIN |
| 181 | 7.70 | -85.60 | 31.60 | VIN |
| 182 | 35.40 | -77.10 | 21.10 | VIN |
| 183 | 31.70 | -85.70 | 2.40 | VIN |
| 184 | 43.80 | -67.20 | 2.00 | VIN |
| 185 | 47.30 | -52.40 | -11.70 | VIN |
| 186 | 49.00 | -54.50 | 8.80 | VIN |
| 187 | 31.20 | -45.60 | -5.80 | VIN |
| 188 | 26.90 | -69.10 | -6.60 | VIN |
| 189 | 34.90 | -44.00 | -20.00 | VIN |
| 190 | 13.80 | -92.30 | 14.70 | VIN |
| 191 | 10.50 | -73.80 | -1.50 | VIN |
| 192 | 20.40 | -87.30 | -6.60 | VIN |
| 193 | 5.10 | -80.20 | 23.10 | VIN |
| 194 | 14.60 | -70.30 | 23.30 | VIN |
| 195 | -38.10 | 48.80 | 10.50 | FPN |
| 196 | -55.90 | -47.70 | -9.30 | FPN |
| 197 | -5.50 | 29.30 | 44.00 | FPN |
| 198 | -40.30 | 50.40 | -4.80 | FPN |
| 199 | -34.10 | -61.00 | 42.40 | FPN |
| 200 | -43.00 | 19.40 | 33.50 | FPN |
| 201 | -40.20 | 23.60 | 23.30 | FPN |
| 202 | -21.30 | 63.10 | 1.90 | FPN |
| 203 | -28.60 | 50.90 | 10.10 | FPN |
| 204 | 47.90 | -42.50 | 41.50 | FPN |
| 205 | 38.10 | 45.90 | 7.70 | FPN |
| 206 | 59.70 | -41.00 | -10.90 | FPN |
| 207 | 7.00 | 25.70 | 47.30 | FPN |
| 208 | 42.80 | 48.30 | -5.10 | FPN |
| 209 | 41.50 | -53.50 | 44.00 | FPN |
| 210 | 35.70 | -56.70 | 45.20 | FPN |
| 211 | 37.80 | 28.70 | 35.60 | FPN |
| 212 | 41.80 | 29.10 | 21.60 | FPN |
| 213 | 38.60 | 18.80 | 25.50 | FPN |
| 214 | 28.40 | 57.00 | -5.10 | FPN |
| 215 | 23.50 | 59.10 | 4.90 | FPN |
| 216 | 30.90 | 52.20 | 9.90 | FPN |
| 217 | 42.40 | 19.50 | 48.20 | FPN |
| 218 | 38.90 | 9.60 | 42.70 | FPN |
| 219 | -10.00 | 33.90 | 21.50 | SAN |
| 220 | -32.50 | 17.20 | -7.80 | SAN |
| 221 | 8.40 | 34.70 | 22.60 | SAN |
| 222 | 30.60 | 22.80 | -4.70 | SAN |
| 223 | -3.80 | 12.10 | 64.60 | VAT |
| 224 | -44.80 | -54.00 | 14.60 | VAT |
| 225 | -51.60 | -55.90 | 11.40 | VAT |
| 226 | -48.10 | -40.00 | 2.40 | VAT |
| 227 | -50.00 | 20.80 | 10.60 | VAT |
| 228 | -47.20 | 39.00 | -9.10 | VAT |
| 229 | -29.10 | 20.50 | -14.00 | VAT |
| 230 | -44.30 | 33.20 | -7.20 | VAT |
| 231 | -45.40 | 28.80 | 0.80 | VAT |
| 232 | -38.70 | 4.80 | 48.40 | VAT |
| 233 | -59.00 | -18.00 | -3.00 | VAT |
| 234 | 57.50 | -45.30 | 9.00 | VAT |
| 235 | 60.90 | -38.70 | 1.70 | VAT |
| 236 | 57.10 | -17.00 | -2.60 | VAT |
| 237 | 47.40 | -39.60 | 13.20 | VAT |
| 238 | 45.50 | -37.30 | 3.40 | VAT |
| 239 | 48.50 | -26.50 | -0.10 | VAT |
| 240 | 52.50 | 23.70 | 10.30 | VAT |
| 241 | 48.10 | 38.30 | -9.20 | VAT |
| 242 | 45.20 | 30.70 | -5.60 | VAT |
| 243 | 27.40 | 19.70 | -14.90 | VAT |
| 244 | 57.10 | -6.30 | -7.70 | VAT |
| 245 | 46.60 | -21.50 | -8.50 | VAT |
| 246 | -27.30 | -6.80 | 46.30 | DAT |
| 247 | -27.30 | 1.90 | 52.90 | DAT |
| 248 | -19.80 | 6.40 | 55.70 | DAT |
| 249 | -21.30 | -0.20 | 62.70 | DAT |
| 250 | -31.10 | -48.90 | 47.10 | DAT |
| 251 | -42.90 | -45.00 | 43.00 | DAT |
| 252 | -51.70 | -30.90 | 39.90 | DAT |
| 253 | -43.60 | 36.30 | 8.50 | DAT |
| 254 | -20.40 | -64.60 | 51.40 | DAT |
| 255 | -25.80 | -65.00 | 32.20 | DAT |
| 256 | -9.90 | -56.90 | 59.80 | DAT |
| 257 | -7.10 | -63.70 | 54.90 | DAT |
| 258 | -30.00 | -74.10 | 36.10 | DAT |
| 259 | -46.20 | -57.70 | -7.90 | DAT |
| 260 | -45.20 | 2.70 | 32.40 | DAT |
| 261 | -34.70 | 5.60 | 34.00 | DAT |
| 262 | -37.60 | 38.40 | 17.20 | DAT |
| 263 | -41.60 | 8.70 | 22.20 | DAT |
| 264 | -35.70 | 33.10 | 32.00 | DAT |
| 265 | 10.30 | -57.30 | 58.30 | DAT |
| 266 | 29.20 | 1.90 | 52.40 | DAT |
| 267 | 29.90 | -7.80 | 47.40 | DAT |
| 268 | 22.60 | 5.60 | 57.60 | DAT |
| 269 | 38.80 | -42.60 | 40.40 | DAT |
| 270 | 36.80 | 37.80 | 13.10 | DAT |
| 271 | 48.10 | 38.40 | 2.40 | DAT |
| 272 | 23.00 | -66.40 | 51.80 | DAT |
| 273 | 32.30 | -63.60 | 33.80 | DAT |
| 274 | 33.50 | -48.20 | 49.40 | DAT |
| 275 | 57.00 | -53.80 | -1.10 | DAT |
| 276 | 47.30 | 2.00 | 37.60 | DAT |
| 277 | 46.60 | 7.80 | 19.30 | DAT |
| 278 | -14.40 | -57.80 | 18.40 | RST |
| 279 | -8.80 | -49.80 | 4.20 | RST |
| 280 | -33.80 | -33.20 | -15.40 | RST |
| 281 | -22.50 | -37.10 | -15.00 | RST |
| 282 | 13.80 | -54.10 | 10.90 | RST |
| 283 | 34.60 | -35.60 | -12.30 | RST |
| 284 | 34.60 | -23.90 | -20.40 | RST |
| 285 | 24.50 | -36.20 | -13.20 | RST |

*Note*. SMN, sensorimotor networks; CON, cingulo-opercular network; CPN: Cingulo-Parietal network; AUD, auditory network; DMN, default mode network; VIN, visual network; FPN, fronto-parietal network; SAN, salience network; VAN, ventral attention network; DAN, dorsal attention network; RST: Retrosplenial temporal network.

**Supplementary file 1S.** **Graph-analysis results using 285 ROIs from the Gordon atlas.**

| **Duration of time window** | **Threshold** | ***Eg*** | | ***Eloc*** | | **PC** | | **Modularity** | |
| --- | --- | --- | --- | --- | --- | --- | --- | --- | --- |
| *z* | *P* | *z* | *P* | *z* | *P* | *z* | *P* |
| 41TR (30 s) | 0.10 | 4.0764 | 0.0001 | 0.9014 | 0.3674 | 2.8656 | 0.0042 | 3.1077 | 0.0019 |
| 0.15 | 4.1302 | 0.0001 | -0.4978 | 0.6186 | 1.8431 | 0.0653 | 2.8925 | 0.0038 |
| 0.20 | 4.1571 | 0.0001 | -3.1077 | 0.0019 | 1.8431 | 0.0653 | 2.7311 | 0.0063 |
| 0.25 | 4.1840 | 0.0001 | -4.0764 | 0.0000 | 3.2692 | 0.0011 | 2.3813 | 0.0173 |
| 50TR (36 s) | 0.10 | 3.7266 | 0.0002 | 2.2736 | 0.0230 | 1.8431 | 0.0653 | 2.9463 | 0.0032 |
| 0.15 | 3.7535 | 0.0002 | -0.2556 | 0.7982 | 1.4395 | 0.1500 | 2.7311 | 0.0063 |
| 0.20 | 3.8342 | 0.0001 | -3.4575 | 0.0005 | 1.8162 | 0.0693 | 2.5965 | 0.0094 |
| 0.25 | 4.0495 | 0.0001 | -3.9419 | 0.0001 | 2.0584 | 0.0396 | 2.5427 | 0.0110 |
| 62TR (45 s) | 0.10 | 4.0226 | 0.0001 | 2.8925 | 0.0038 | 2.0584 | 0.0396 | 3.6997 | 0.0002 |
| 0.15 | 4.0764 | 0.0001 | -0.3902 | 0.6964 | 1.9777 | 0.0480 | 3.6459 | 0.0003 |
| 0.20 | 4.1033 | 0.0001 | -3.0270 | 0.0025 | 1.9508 | 0.0511 | 3.2423 | 0.0012 |
| 0.25 | 4.1033 | 0.0001 | -3.8342 | 0.0001 | 2.6772 | 0.0074 | 2.9194 | 0.0035 |
| 83TR (60 s) | 0.10 | 3.5114 | 0.0004 | 1.4395 | 0.1500 | 2.3544 | 0.0186 | 3.3230 | 0.0009 |
| 0.15 | 3.6459 | 0.0003 | -1.5741 | 0.1155 | 2.0584 | 0.0396 | 3.1616 | 0.0016 |
| 0.20 | 3.6459 | 0.0003 | -3.3499 | 0.0008 | 2.8925 | 0.0038 | 2.8118 | 0.0049 |
| 0.25 | 3.5114 | 0.0004 | -3.8073 | 0.0001 | 1.9508 | 0.0511 | 2.4351 | 0.0149 |

*Notes*. Statistics are derived from Wilcoxon signed-rank tests. Graph metrics (*Eg*: global efficiency; *Eloc*: local efficiency; PC: participation coefficient; Modularity) were computed at the entire-network level.

**Supplementary file 1T.** **Graph-analysis results using 226 ROIs from the Power atlas combining with the bilateral hippocampus ROIs derived from Kim’s meta-analysis.**

| **Duration of time window** | **Threshold** | ***Eg*** | | ***Eloc*** | | **PC** | | **Modularity** | |
| --- | --- | --- | --- | --- | --- | --- | --- | --- | --- |
| *z* | *P* | *z* | *P* | *z* | *P* | *z* | *P* |
| 41TR (30 s) | 0.10 | 4.1840 | 0.0001 | 0.0673 | 0.9464 | 2.5158 | 0.0119 | 2.5965 | 0.0094 |
| 0.15 | 4.2917 | 0.0001 | -1.3050 | 0.1919 | 2.5696 | 0.0102 | 2.5427 | 0.0110 |
| 0.20 | 4.3186 | 0.0001 | -3.1347 | 0.0017 | 2.3005 | 0.0214 | 2.1660 | 0.0303 |
| 0.25 | 4.2647 | 0.0001 | -3.9957 | 0.0001 | 2.1122 | 0.0347 | 1.8969 | 0.0578 |
| 50TR (36 s) | 0.10 | 3.8342 | 0.0001 | 1.4395 | 0.1500 | 3.1616 | 0.0016 | 3.0539 | 0.0023 |
| 0.15 | 4.0226 | 0.0001 | -0.5516 | 0.5812 | 2.7041 | 0.0068 | 2.5427 | 0.0110 |
| 0.20 | 3.9957 | 0.0001 | -2.4351 | 0.0149 | 2.4620 | 0.0138 | 2.1122 | 0.0347 |
| 0.25 | 4.1571 | 0.0001 | -3.7535 | 0.0002 | 1.8431 | 0.0653 | 1.7086 | 0.0875 |
| 62TR (45 s) | 0.10 | 4.2378 | 0.0001 | 1.9508 | 0.0511 | 3.2961 | 0.0010 | 3.3230 | 0.0009 |
| 0.15 | 4.2647 | 0.0001 | -0.2018 | 0.8401 | 3.1347 | 0.0017 | 3.2423 | 0.0012 |
| 0.20 | 4.2917 | 0.0001 | -2.8925 | 0.0038 | 2.8656 | 0.0042 | 2.7311 | 0.0063 |
| 0.25 | 4.2647 | 0.0001 | -3.9419 | 0.0001 | 2.4620 | 0.0138 | 2.0046 | 0.0450 |
| 83TR (60 s) | 0.10 | 3.0539 | 0.0023 | 0.3363 | 0.7366 | 3.2154 | 0.0013 | 3.2154 | 0.0013 |
| 0.15 | 3.5652 | 0.0004 | -1.4395 | 0.1500 | 2.8925 | 0.0038 | 2.5696 | 0.0102 |
| 0.20 | 3.6997 | 0.0002 | -2.4082 | 0.0160 | 2.5696 | 0.0102 | 2.6772 | 0.0074 |
| 0.25 | 3.5921 | 0.0003 | -3.4575 | 0.0005 | 2.2467 | 0.0247 | 2.4351 | 0.0149 |

*Notes*. Statistics are derived from Wilcoxon signed-rank tests. Graph metrics (*Eg*: global efficiency; *Eloc*: local efficiency; PC: participation coefficient; Modularity) were computed at the entire-network level.

**Supplementary file 1U. Edge stability analysis.**

| **Threshold** | **High encoding state**  **(Real vs. Randomized)** | | **Low encoding state**  **(Real vs. Randomized)** | | **High vs. low encoding states** | |
| --- | --- | --- | --- | --- | --- | --- |
| ***z*** | ***P*** | ***z*** | ***P*** | ***z*** | ***P*** |
| 0.1 | 4.3724 | 0.00001 | 4.3724 | 0.00001 | 2.3006 | 0.0214 |
| 0.15 | 4.3724 | 0.00001 | 4.3724 | 0.00001 | 1.2916 | 0.1965 |
| 0.2 | 4.3724 | 0.00001 | 4.3724 | 0.00001 | 2.3006 | 0.0214 |
| 0.25 | 4.3724 | 0.00001 | 4.3724 | 0.00001 | 2.2198 | 0.0264 |

*Notes.* Statistics are derived from Wilcoxon signed-rank tests. Comparisons between the real and randomized networks gave the same results in most cases because the signed ranks were identical.

**Supplementary file 1V. Results of additional analysis using adjusted graph metrics.** We computed “adjusted” graph metrics by regressing out overall FC on a window-by-window basis.

| **Duration of time window** | **Threshold** | ***Eg*** | | ***Eloc*** | | **PC** | | **Modularity** | |
| --- | --- | --- | --- | --- | --- | --- | --- | --- | --- |
| *z* | *P* | *z* | *P* | *z* | *P* | *z* | *P* |
| 36 s | 0.10 | 0.4440 | 0.6571 | 1.8969 | 0.0578 | -1.2243 | 0.2209 | 2.5427 | 0.0110 |
| 0.15 | 0.3363 | 0.7366 | 1.4126 | 0.1578 | -1.0897 | 0.2758 | 2.0853 | 0.0370 |
| 0.20 | 0.0673 | 0.9464 | 1.4395 | 0.1500 | -0.8207 | 0.4118 | 2.1391 | 0.0324 |
| 0.25 | 0.4709 | 0.6377 | 0.4709 | 0.6377 | -0.4978 | 0.6186 | 2.0315 | 0.0422 |

*Notes*. Statistics are derived from Wilcoxon signed-rank tests. Graph metrics (*Eg*: global efficiency; *Eloc*: local efficiency; PC: participation coefficient; Modularity) were computed at the entire-network level.**Supplementary file 1W. Graph-analysis results from the group of 13 subjects showing the minimal difference in FD** **between high and low encoding states.**

| **Duration of time window** | **Threshold** | ***Eg*** | | ***Eloc*** | | **PC** | | **Modularity** | |
| --- | --- | --- | --- | --- | --- | --- | --- | --- | --- |
| **Signed rank** | ***P*** | **Signed rank** | ***P*** | **Signed rank** | ***P*** | **Signed rank** | ***P*** |
| 41TR (30 s) | 0.10 | 90 | 0.0005 | 48 | 0.8926 | 69 | 0.1099 | 60 | 0.3396 |
| 0.15 | 90 | 0.0005 | 36 | 0.5417 | 46 | 1.0000 | 59 | 0.3757 |
| 0.20 | 90 | 0.0005 | 17 | 0.0479 | 43 | 0.8926 | 63 | 0.2439 |
| 0.25 | 91 | 0.0002 | 3 | 0.0012 | 48 | 0.8926 | 61 | 0.3054 |
| 50TR (36 s) | 0.10 | 82 | 0.0081 | 62 | 0.2734 | 78 | 0.0215 | 71 | 0.0803 |
| 0.15 | 83 | 0.0061 | 36 | 0.5417 | 80 | 0.0134 | 65 | 0.1909 |
| 0.20 | 83 | 0.0061 | 20 | 0.0803 | 62 | 0.2734 | 61 | 0.3054 |
| 0.25 | 86 | 0.0024 | 9 | 0.0081 | 71 | 0.0803 | 57 | 0.4548 |
| 62TR (45 s) | 0.10 | 88 | 0.0012 | 53 | 0.6355 | 73 | 0.0574 | 71 | 0.0803 |
| 0.15 | 89 | 0.0007 | 32 | 0.3757 | 78 | 0.0215 | 68 | 0.1272 |
| 0.20 | 90 | 0.0005 | 12 | 0.0171 | 80 | 0.0134 | 63 | 0.2439 |
| 0.25 | 91 | 0.0002 | 3 | 0.0012 | 82 | 0.0081 | 62 | 0.2734 |
| 83TR (60 s) | 0.10 | 78 | 0.0215 | 47 | 0.9460 | 36 | 0.5417 | 76 | 0.0327 |
| 0.15 | 80 | 0.0134 | 39 | 0.6848 | 30 | 0.3054 | 73 | 0.0574 |
| 0.20 | 83 | 0.0061 | 19 | 0.0681 | 46 | 1.0000 | 72 | 0.0681 |
| 0.25 | 83 | 0.0061 | 11 | 0.0134 | 61 | 0.3054 | 67 | 0.1465 |

*Notes*. Statistics are derived from Wilcoxon signed-rank tests. Graph metrics (*Eg*: global efficiency; *Eloc*: local efficiency; PC: participation coefficient; Modularity) were computed at the entire-network level.
